# Supplementary material for: Comparison of exome-based HLA class I genotyping tools: identification of platform-specific genotyping errors
Source: PubMed Central journal article supplement — J Hum Genet. 2016 Nov 24;62(3):397–405. doi: 10.1038/jhg.2016.141 (PMC5334549; doi:10.1038/jhg.2016.141), 2016-11-24
Supplement: jhg2016141x2.pdf [file jhg2016141x2.pdf]

**Supplementary Table 1. Overview of the 1000 Genomes Project samples typed for HLA genes.**

| Code  | Description of 1000 Genomes Project               | Ancestry   | Sample Size |
|-------|---------------------------------------------------|------------|-------------|
| LWK   | Luhya from Webuye, Kenya                          | African    | 76          |
| YRI   | Yoruba from Ibadan, Nigeria                       | African    | 50          |
| ASW   | African Ancestry from Southwest, USA              | American   | 50          |
| CLM   | Colombian from Medellin, Colombia                 | American   | 69          |
| MXL   | Mexican Ancestry from Los Angeles-California, USA | American   | 49          |
| PUR   | Puerto Rican, Puerto Rico                         | American   | 70          |
| CHB   | Han Chinese from Beijing, China                   | East Asian | 85          |
| CHS   | Han from south, China                             | East Asian | 96          |
| JPT   | Japanese from Tokyo, Japan                        | East Asian | 90          |
| CEU   | Northern and Western European from Utah, USA      | European   | 52          |
| FIN   | Finnish, Finland                                  | European   | 97          |
| GBR   | British from England and Scotland, UK             | European   | 88          |
| TSI   | Italian from Tuscany, Italy                       | European   | 89          |
| total |                                                   |            | 961         |

**Supplementary Table 2. Allele frequency in the 1000 Genomes Project samples used in this study (N = 961).**

| Gene                | Allele   | Counts | Frequency |
|---------------------|----------|--------|-----------|
| <b><u>HLA-A</u></b> | A*01:01  | 116    | 6.0%      |
|                     | A*01:02  | 4      | 0.2%      |
|                     | A*02:01  | 377    | 19.6%     |
|                     | A*02:02  | 24     | 1.2%      |
|                     | A*02:03  | 16     | 0.8%      |
|                     | A*02:04  | 3      | 0.2%      |
|                     | A*02:05  | 16     | 0.8%      |
|                     | A*02:06  | 38     | 2.0%      |
|                     | A*02:07  | 35     | 1.8%      |
|                     | A*02:10  | 2      | 0.1%      |
|                     | A*02:11  | 6      | 0.3%      |
|                     | A*02:14  | 1      | 0.1%      |
|                     | A*02:147 | 1      | 0.1%      |
|                     | A*02:17  | 1      | 0.1%      |
|                     | A*02:20  | 2      | 0.1%      |
|                     | A*02:22  | 2      | 0.1%      |
|                     | A*03:01  | 190    | 9.9%      |
|                     | A*03:02  | 4      | 0.2%      |
|                     | A*11:01  | 166    | 8.6%      |
|                     | A*11:02  | 9      | 0.5%      |
|                     | A*23:01  | 49     | 2.5%      |
|                     | A*24:02  | 244    | 12.7%     |
|                     | A*24:03  | 4      | 0.2%      |
|                     | A*24:04  | 2      | 0.1%      |
|                     | A*24:08  | 1      | 0.1%      |
|                     | A*24:20  | 1      | 0.1%      |
|                     | A*24:24  | 1      | 0.1%      |
|                     | A*25:01  | 15     | 0.8%      |
|                     | A*26:01  | 49     | 2.5%      |
|                     | A*26:02  | 2      | 0.1%      |
|                     | A*26:03  | 7      | 0.4%      |
|                     | A*26:08  | 3      | 0.2%      |
|                     | A*29:01  | 6      | 0.3%      |
|                     | A*29:02  | 53     | 2.8%      |
|                     | A*30:01  | 63     | 3.3%      |
|                     | A*30:02  | 48     | 2.5%      |
|                     | A*30:04  | 3      | 0.2%      |
|                     | A*30:10  | 1      | 0.1%      |
|                     | A*31:01  | 65     | 3.4%      |
|                     | A*31:04  | 4      | 0.2%      |
| A*32:01             | 42       | 2.2%   |           |
| A*33:01             | 11       | 0.6%   |           |
| A*33:03             | 63       | 3.3%   |           |
| A*34:02             | 12       | 0.6%   |           |
| A*36:01             | 21       | 1.1%   |           |
| A*66:01             | 12       | 0.6%   |           |
| A*66:02             | 8        | 0.4%   |           |
| A*68:01             | 53       | 2.8%   |           |
| A*68:02             | 35       | 1.8%   |           |
| A*68:03             | 1        | 0.1%   |           |
| A*69:01             | 2        | 0.1%   |           |
| A*74:01             | 22       | 1.1%   |           |
| A*74:03             | 2        | 0.1%   |           |
| A*80:01             | 4        | 0.2%   |           |
| <b><u>HLA-B</u></b> | B*07:02  | 138    | 7.2%      |
|                     | B*07:05  | 7      | 0.4%      |
|                     | B*08:01  | 73     | 3.8%      |
|                     | B*13:01  | 23     | 1.2%      |
|                     | B*13:02  | 47     | 2.4%      |
|                     | B*14:01  | 9      | 0.5%      |
|                     | B*14:02  | 37     | 1.9%      |
|                     | B*14:03  | 1      | 0.1%      |
|                     | B*15:01  | 73     | 3.8%      |
|                     | B*15:02  | 12     | 0.6%      |
|                     | B*15:03  | 27     | 1.4%      |
|                     | B*15:07  | 5      | 0.3%      |
|                     | B*15:09  | 1      | 0.1%      |
|                     | B*15:10  | 17     | 0.9%      |
|                     | B*15:11  | 3      | 0.2%      |
|                     | B*15:12  | 1      | 0.1%      |
|                     | B*15:15  | 3      | 0.2%      |
| B*15:16             | 7        | 0.4%   |           |

|         |     |      |
|---------|-----|------|
| B*15:17 | 7   | 0.4% |
| B*15:18 | 12  | 0.6% |
| B*15:20 | 1   | 0.1% |
| B*15:25 | 1   | 0.1% |
| B*15:27 | 3   | 0.2% |
| B*15:37 | 1   | 0.1% |
| B*18:01 | 54  | 2.8% |
| B*18:03 | 1   | 0.1% |
| B*18:05 | 1   | 0.1% |
| B*18:06 | 1   | 0.1% |
| B*27:03 | 4   | 0.2% |
| B*27:04 | 4   | 0.2% |
| B*27:05 | 34  | 1.8% |
| B*27:07 | 1   | 0.1% |
| B*35:01 | 126 | 6.6% |
| B*35:02 | 12  | 0.6% |
| B*35:03 | 22  | 1.1% |
| B*35:05 | 2   | 0.1% |
| B*35:08 | 9   | 0.5% |
| B*35:10 | 2   | 0.1% |
| B*35:11 | 2   | 0.1% |
| B*35:12 | 5   | 0.3% |
| B*35:14 | 1   | 0.1% |
| B*35:17 | 7   | 0.4% |
| B*35:43 | 10  | 0.5% |
| B*37:01 | 12  | 0.6% |
| B*38:01 | 17  | 0.9% |
| B*38:02 | 8   | 0.4% |
| B*39:01 | 30  | 1.6% |
| B*39:02 | 1   | 0.1% |
| B*39:03 | 1   | 0.1% |
| B*39:05 | 7   | 0.4% |
| B*39:06 | 16  | 0.8% |
| B*39:08 | 1   | 0.1% |
| B*39:10 | 4   | 0.2% |
| B*39:11 | 4   | 0.2% |
| B*40:01 | 116 | 6.0% |
| B*40:02 | 52  | 2.7% |
| B*40:04 | 4   | 0.2% |
| B*40:06 | 16  | 0.8% |
| B*40:12 | 2   | 0.1% |
| B*40:20 | 1   | 0.1% |
| B*41:01 | 9   | 0.5% |
| B*41:02 | 6   | 0.3% |
| B*41:04 | 1   | 0.1% |
| B*42:01 | 26  | 1.4% |
| B*42:02 | 3   | 0.2% |
| B*44:02 | 79  | 4.1% |
| B*44:03 | 84  | 4.4% |
| B*44:05 | 2   | 0.1% |
| B*45:01 | 30  | 1.6% |
| B*46:01 | 64  | 3.3% |
| B*47:01 | 4   | 0.2% |
| B*48:01 | 18  | 0.9% |
| B*48:02 | 1   | 0.1% |
| B*48:03 | 1   | 0.1% |
| B*48:05 | 1   | 0.1% |
| B*49:01 | 21  | 1.1% |
| B*50:01 | 13  | 0.7% |
| B*51:01 | 107 | 5.6% |
| B*51:02 | 4   | 0.2% |
| B*51:08 | 1   | 0.1% |
| B*51:23 | 1   | 0.1% |
| B*52:01 | 48  | 2.5% |
| B*53:01 | 60  | 3.1% |
| B*54:01 | 19  | 1.0% |
| B*55:01 | 18  | 0.9% |
| B*55:02 | 10  | 0.5% |
| B*56:01 | 19  | 1.0% |
| B*57:01 | 46  | 2.4% |
| B*57:02 | 3   | 0.2% |
| B*57:03 | 13  | 0.7% |
| B*58:01 | 57  | 3.0% |
| B*58:02 | 19  | 1.0% |
| B*59:01 | 5   | 0.3% |
| B*67:01 | 8   | 0.4% |

|                     |         |     |       |
|---------------------|---------|-----|-------|
|                     | B*73:01 | 1   | 0.1%  |
|                     | B*78:01 | 3   | 0.2%  |
|                     | B*81:01 | 16  | 0.8%  |
|                     | B*82:01 | 1   | 0.1%  |
|                     | B*82:02 | 1   | 0.1%  |
| <b><u>HLA-C</u></b> |         |     |       |
|                     | C*01:02 | 144 | 7.5%  |
|                     | C*01:03 | 4   | 0.2%  |
|                     | C*02:02 | 43  | 2.2%  |
|                     | C*02:10 | 20  | 1.0%  |
|                     | C*03:02 | 38  | 2.0%  |
|                     | C*03:03 | 102 | 5.3%  |
|                     | C*03:04 | 164 | 8.5%  |
|                     | C*03:05 | 8   | 0.4%  |
|                     | C*03:36 | 1   | 0.1%  |
|                     | C*04:01 | 254 | 13.2% |
|                     | C*04:03 | 2   | 0.1%  |
|                     | C*04:04 | 2   | 0.1%  |
|                     | C*05:01 | 91  | 4.7%  |
|                     | C*06:02 | 146 | 7.6%  |
|                     | C*07:01 | 145 | 7.5%  |
|                     | C*07:02 | 244 | 12.7% |
|                     | C*07:04 | 30  | 1.6%  |
|                     | C*08:01 | 49  | 2.5%  |
|                     | C*08:02 | 49  | 2.5%  |
|                     | C*08:03 | 3   | 0.2%  |
|                     | C*08:04 | 15  | 0.8%  |
|                     | C*12:02 | 36  | 1.9%  |
|                     | C*12:03 | 64  | 3.3%  |
|                     | C*14:02 | 47  | 2.4%  |
|                     | C*14:03 | 15  | 0.8%  |
|                     | C*15:02 | 48  | 2.5%  |
|                     | C*15:05 | 11  | 0.6%  |
|                     | C*16:01 | 86  | 4.5%  |
|                     | C*16:02 | 5   | 0.3%  |
|                     | C*16:04 | 3   | 0.2%  |
|                     | C*17:01 | 41  | 2.1%  |
|                     | C*18:01 | 12  | 0.6%  |

---

**Supplementary Table 3. HLA typing results 12 clinical samples in several algorithms.**

| Sample       | Software     | HLA-A           |                | HLA-B          |                | HLA-C           |                 |
|--------------|--------------|-----------------|----------------|----------------|----------------|-----------------|-----------------|
| MPM2N        | HLA genotype | A*25:01         | A*25:01        | B*39:01        | B*40:01        | C*03:04         | C*12:03         |
|              | Optitype     | A*25:01         | A*25:01        | B*39:01        | B*40:01        | C*03:04         | C*12:03         |
|              | Polysolver   | <b>A*26:01</b>  | <b>A*26:01</b> | B*39:01        | B*40:01        | C*03:04         | C*12:03         |
|              | PHLAT        | <b>A*01:22</b>  | A*25:01        | B*39:01        | B*40:01        | C*03:04         | C*12:03         |
|              | HLAreporter  | A*25:01         | A*25:01        | B*39:01        | B*40:01        | C*03:04         | C*12:03         |
|              | HLAforest    | A*25:01         | A*25:01        | <b>B*39:39</b> | <b>B*40:06</b> | <b>C*03:38</b>  | C*12:03         |
|              | HLAminer     | A*25:01         | A*25:01        | B*39:01        | B*40:01        | <b>C*03:03</b>  | <b>C*12:02</b>  |
|              | seq2HLA      | A*25:01         | A*25:01        | B*39:01        | B*40:01        | C*03:04         | <b>C*12:02</b>  |
| MPM3N        | HLA genotype | A*29:02         | A*32:01        | B*14:01        | B*53:01        | C*04:01         | C*08:02         |
|              | Optitype     | A*29:02         | A*32:01        | B*14:01        | B*53:01        | C*04:01         | C*08:02         |
|              | Polysolver   | A*29:02         | A*32:01        | B*14:01        | B*53:01        | C*04:01         | C*08:02         |
|              | PHLAT        | A*29:02         | A*32:01        | B*14:01        | B*53:01        | C*04:01         | C*08:02         |
|              | HLAreporter  | A*29:02         | <b>A*29:02</b> | B*14:01        | B*53:01        | C*04:01         | C*08:02         |
|              | HLAforest    | <b>A*29:18</b>  | <b>A*74:06</b> | <b>B*14:12</b> | <b>B*51:09</b> | <b>C*04:14</b>  | <b>C*08:45</b>  |
|              | HLAminer     | A*29:02         | A*32:01        | B*14:01        | B*53:01        | C*04:01         | C*08:02         |
|              | seq2HLA      | A*29:02         | <b>A*32:03</b> | <b>B*14:02</b> | B*53:01        | C*04:01         | C*08:02         |
| MPM4N        | HLA genotype | A*02:01         | A*02:01        | B*07:02        | B*55:01        | C*03:03         | C*07:02         |
|              | Optitype     | A*02:01         | A*02:01        | B*07:02        | B*55:01        | C*03:03         | C*07:02         |
|              | Polysolver   | A*02:01         | A*02:01        | B*07:02        | B*55:01        | C*03:03         | C*07:02         |
|              | PHLAT        | <b>A*01:81</b>  | <b>A*01:81</b> | B*07:02        | B*55:01        | C*03:03         | C*07:02         |
|              | HLAreporter  | A*02:01         | A*02:01        | B*07:02        | B*55:01        | C*03:03         | C*07:02         |
|              | HLAforest    | A*02:01         | A*02:01        | <b>B*07:56</b> | <b>B*55:02</b> | <b>C*03:38</b>  | <b>C*07:51</b>  |
|              | HLAminer     | <b>A*02:06</b>  | <b>A*69:01</b> | <b>B*07:33</b> | B*55:01        | C*03:03         | <b>C*07:391</b> |
|              | seq2HLA      | A*02:01         | <b>A*33:01</b> | B*07:02        | B*55:01        | <b>C*03:04</b>  | C*07:02         |
| MPM5N        | HLA genotype | A*02:01         | A*29:02        | B*44:02        | B*44:03        | C*05:01         | C*16:01         |
|              | Optitype     | A*02:01         | A*29:02        | B*44:02        | B*44:03        | C*05:01         | C*16:01         |
|              | Polysolver   | A*02:01         | A*29:02        | <b>B*44:03</b> | B*44:03        | C*05:01         | C*16:01         |
|              | PHLAT        | A*02:01         | A*29:02        | B*44:02        | B*44:03        | C*05:01         | C*16:01         |
|              | HLAreporter  | <b>A*02</b>     | <b>A*29</b>    | B*44:02        | B*44:03        | <b>C*05:29</b>  | C*16:01         |
|              | HLAforest    | <b>A*02:152</b> | <b>A*29:01</b> | B*44:02        | <b>B*44:02</b> | <b>C*05:29</b>  | <b>C*16:15</b>  |
|              | HLAminer     | <b>A*02:48</b>  | A*29:02        | <b>B*44:46</b> | <b>B*51:42</b> | <b>C*08:94</b>  | C*16:01         |
|              | seq2HLA      | A*02:01         | A*29:02        | B*44:02        | <b>B*44:02</b> | <b>C*08:02</b>  | <b>C*16:02</b>  |
| MPM6N        | HLA genotype | A*01:01         | A*33:01        | B*07:02        | B*14:02        | C*07:02         | C*08:02         |
|              | Optitype     | A*01:01         | A*33:01        | B*07:02        | B*14:02        | C*07:02         | C*08:02         |
|              | Polysolver   | A*01:01         | A*33:01        | B*07:02        | B*14:02        | C*07:02         | C*08:02         |
|              | PHLAT        | A*01:01         | A*33:01        | B*07:02        | B*14:02        | C*07:02         | C*08:02         |
|              | HLAreporter  | <b>A*01</b>     | A*33:01        | B*07:02        | B*14:02        | <b>C*07</b>     | C*08:02         |
|              | HLAforest    | <b>A*01:32</b>  | A*33:01        | <b>B*07:13</b> | B*14:02        | <b>C*07:41</b>  | <b>C*08:82</b>  |
|              | HLAminer     | A*01:01         | A*33:01        | B*07:02        | B*14:02        | <b>C*07:402</b> | <b>C*08:62</b>  |
|              | seq2HLA      | A*01:01         | A*33:01        | B*07:02        | B*14:02        | C*07:02         | <b>C*05:01</b>  |
| MPM7N        | HLA genotype | A*23:01         | A*68:01        | B*39:01        | B*52:01        | C*12:02         | C*12:03         |
|              | Optitype     | A*23:01         | A*68:01        | B*39:01        | B*52:01        | C*12:02         | C*12:03         |
|              | Polysolver   | A*23:01         | A*68:01        | B*39:01        | B*52:01        | C*12:02         | C*12:03         |
|              | PHLAT        | A*23:01         | A*68:01        | B*39:01        | B*52:01        | C*12:02         | C*12:03         |
|              | HLAreporter  | <b>A*23</b>     | <b>A*68</b>    | B*39:01        | B*52:01        | C*12:02         | C*12:03         |
|              | HLAforest    | <b>A*24:24</b>  | A*68:01        | B*39:01        | B*52:01        | <b>C*12:14</b>  | <b>C*12:14</b>  |
|              | HLAminer     | A*23:01         | <b>A*24:02</b> | <b>B*39:34</b> | B*52:01        | C*12:02         | C*12:03         |
|              | seq2HLA      | A*23:01         | A*68:01        | B*39:01        | B*52:01        | <b>C*12:03</b>  | C*12:03         |
| HLA genotype | A*03:01      | A*25:01         | B*07:02        | B*07:02        | C*07:02        | C*07:02         |                 |

|        |              |                |                |                |                 |                 |                 |
|--------|--------------|----------------|----------------|----------------|-----------------|-----------------|-----------------|
| MPM8N  | Optitype     | A*03:01        | A*25:01        | B*07:02        | B*07:02         | C*07:02         | C*07:02         |
|        | Polysolver   | A*03:01        | <b>A*26:01</b> | B*07:02        | B*07:02         | C*07:02         | C*07:02         |
|        | PHLAT        | A*03:01        | A*25:01        | B*07:02        | B*07:02         | C*07:02         | C*07:02         |
|        | HLAreporter  | <b>A*03</b>    | A*25:01        | B*07:02        | B*07:02         | C*07:02         | C*07:02         |
|        | HLAforest    | A*03:01        | <b>A*25:13</b> | B*07:02        | B*07:02         | <b>C*07:137</b> | <b>C*07:137</b> |
|        | HLAminer     | A*03:01        | <b>A*11:50</b> | B*07:02        | <b>B*07:33</b>  | C*07:02         | <b>C*07:351</b> |
|        | seq2HLA      | A*03:01        | A*25:01        | B*07:02        | B*07:02         | C*07:02         | C*07:02         |
|        | HLA genotype | A*03:01        | A*03:01        | B*07:02        | B*55:01         | C*07:02         | C*07:02         |
| MPM9N  | Optitype     | A*03:01        | A*03:01        | B*07:02        | B*55:01         | C*07:02         | C*07:02         |
|        | Polysolver   | A*03:01        | A*03:01        | B*07:02        | B*55:01         | C*07:02         | C*07:02         |
|        | PHLAT        | A*03:01        | A*03:01        | B*07:02        | B*55:01         | C*07:02         | C*07:02         |
|        | HLAreporter  | A*03:01        | A*03:01        | B*07:02        | B*55:01         | C*07:02         | C*07:02         |
|        | HLAforest    | <b>A*03:02</b> | <b>A*03:63</b> | <b>B*07:56</b> | <b>B*55:02</b>  | C*07:02         | C*07:02         |
|        | HLAminer     | A*03:01        | <b>A*03:02</b> | <b>B*07:41</b> | B*55:01         | <b>C*07:67</b>  | <b>C*07:351</b> |
|        | seq2HLA      | A*03:01        | <b>A*30:02</b> | B*07:02        | B*55:01         | C*07:02         | C*07:02         |
|        | HLA genotype | A*03:01        | A*03:01        | B*14:02        | B*35:03         | C*04:01         | C*08:02         |
| MPM10N | Optitype     | A*03:01        | A*03:01        | B*14:02        | B*35:03         | C*04:01         | C*08:02         |
|        | Polysolver   | A*03:01        | A*03:01        | B*14:02        | B*35:03         | C*04:01         | C*08:02         |
|        | PHLAT        | A*03:01        | A*03:01        | B*14:02        | B*35:03         | C*04:01         | C*08:02         |
|        | HLAreporter  | A*03:01        | A*03:01        | B*14:02        | B*35:03         | C*04:01         | C*08:02         |
|        | HLAforest    | <b>A*03:26</b> | <b>A*03:26</b> | B*14:02        | B*35:03         | <b>C*04:116</b> | <b>C*08:15</b>  |
|        | HLAminer     | A*03:01        | <b>A*11:50</b> | B*14:02        | B*35:03         | C*04:01         | <b>C*08:62</b>  |
|        | seq2HLA      | A*03:01        | <b>A*30:02</b> | B*14:02        | B*35:03         | C*04:01         | <b>C*05:01</b>  |
|        | HLA genotype | A*02:01        | A*11:01        | B*18:01        | B*35:01         | C*04:01         | C*07:01         |
| MPM11N | Optitype     | A*02:01        | A*11:01        | B*18:01        | B*35:01         | C*04:01         | C*07:01         |
|        | Polysolver   | A*02:01        | A*11:01        | B*18:01        | B*35:01         | C*04:01         | C*07:01         |
|        | PHLAT        | A*02:01        | A*11:01        | B*18:01        | B*35:01         | C*04:01         | C*07:01         |
|        | HLAreporter  | <b>A*02</b>    | <b>A*11</b>    | <b>B*18</b>    | <b>B*35</b>     | C*04:01         | C*07:01         |
|        | HLAforest    | <b>A*02:06</b> | <b>A*11:12</b> | <b>B*35:20</b> | <b>B*35:190</b> | <b>C*04:20</b>  | C*07:01         |
|        | HLAminer     | <b>A*02:07</b> | <b>A*11:50</b> | B*18:01        | <b>B*35:02</b>  | C*04:01         | C*07:01         |
|        | seq2HLA      | <b>A*02:40</b> | A*11:01        | <b>B*18:02</b> | B*35:01         | C*04:01         | C*07:01         |
|        | HLA genotype | A*03:01        | A*29:02        | B*07:02        | B*47:01         | C*07:01         | C*07:02         |
| MPM12N | Optitype     | A*03:01        | A*29:02        | B*07:02        | B*47:01         | C*07:01         | C*07:02         |
|        | Polysolver   | A*03:01        | A*29:02        | B*07:02        | B*47:01         | <b>C*07:06</b>  | C*07:02         |
|        | PHLAT        | A*03:01        | A*29:02        | B*07:02        | B*47:01         | <b>C*07:18</b>  | C*07:02         |
|        | HLAreporter  | A*03:01        | <b>A*29</b>    | B*07:02        | <b>B*47:07</b>  | C*07:01         | <b>C*07:19</b>  |
|        | HLAforest    | <b>A*03:42</b> | A*29:02        | B*07:02        | B*47:01         | <b>C*07:02</b>  | C*07:02         |
|        | HLAminer     | <b>A*03:02</b> | <b>A*11:50</b> | B*07:02        | B*47:01         | C*07:01         | <b>C*07:19</b>  |
|        | seq2HLA      | A*03:01        | <b>A*29:01</b> | B*07:02        | B*47:01         | C*07:01         | <b>C*07:01</b>  |
|        | HLA genotype | A*01:01        | A*31:01        | B*08:01        | B*40:01         | C*03:04         | C*07:01         |
| MPM13N | Optitype     | A*01:01        | A*31:01        | B*08:01        | B*40:01         | C*03:04         | C*07:01         |
|        | Polysolver   | A*01:01        | A*31:01        | B*08:01        | B*40:01         | C*03:04         | C*07:01         |
|        | PHLAT        | <b>A*01:22</b> | A*31:01        | B*08:01        | B*40:01         | C*03:04         | C*07:01         |
|        | HLAreporter  | A*01:01        | A*31:01        | <b>B*08:12</b> | <b>B*40:80</b>  | <b>C*03:37</b>  | <b>C*07:16</b>  |
|        | HLAforest    | A*01:01        | A*31:01        | B*08:01        | <b>B*40:178</b> | <b>C*03:35</b>  | <b>C*07:96</b>  |
|        | HLAminer     | <b>A*11:50</b> | <b>A*33:03</b> | <b>B*08:33</b> | <b>B*41:35</b>  | C*03:04         | <b>C*07:385</b> |
|        | seq2HLA      | A*01:01        | A*31:01        | B*08:01        | B*40:01         | <b>C*03:07</b>  | <b>C*07:06</b>  |

\*HLA genotype was determined by NGS-based method in Scisco Genetics.

The discordant results are highlighted in bold.

**Supplementary Table 4. Accuracy of 7 HLA-typing algorithms in 12 clinical samples.**

|                     | 2nd field    |              |              |                  | 1st field    |              |              |                  |
|---------------------|--------------|--------------|--------------|------------------|--------------|--------------|--------------|------------------|
|                     | <i>HLA-A</i> | <i>HLA-B</i> | <i>HLA-C</i> | <i>HLA-A,B,C</i> | <i>HLA-A</i> | <i>HLA-B</i> | <i>HLA-C</i> | <i>HLA-A,B,C</i> |
| <b>Allele level</b> |              |              |              |                  |              |              |              |                  |
| Optitype            | 1.000        | 1.000        | 1.000        | <b>1.000</b>     | 1.000        | 1.000        | 1.000        | <b>1.000</b>     |
| Polysolver          | 0.875        | 0.958        | 0.958        | <b>0.931</b>     | 1.000        | 1.000        | 0.958        | <b>0.958</b>     |
| PHLAT               | 0.833        | 1.000        | 0.958        | <b>0.931</b>     | 1.000        | 1.000        | 0.958        | <b>0.958</b>     |
| HLAreporter         | 0.583        | 0.792        | 0.792        | <b>0.722</b>     | 1.000        | 1.000        | 0.986        | <b>0.986</b>     |
| HLAforest           | 0.417        | 0.458        | 0.208        | <b>0.361</b>     | 0.917        | 1.000        | 0.944        | <b>0.944</b>     |
| HLAminer            | 0.458        | 0.625        | 0.500        | <b>0.528</b>     | 0.917        | 0.958        | 0.861        | <b>0.861</b>     |
| seq2HLA             | 0.750        | 0.875        | 0.583        | <b>0.736</b>     | 1.000        | 0.875        | 0.917        | <b>0.917</b>     |

**Supplementary Table 6. Accuracy of 3 exome-based HLA-typing algorithms in the 1000 Genomes Project samples.**

|            | 2nd field    |              |              |                  | 1st field    |              |              |                  |
|------------|--------------|--------------|--------------|------------------|--------------|--------------|--------------|------------------|
|            | <i>HLA-A</i> | <i>HLA-B</i> | <i>HLA-C</i> | <i>HLA-A,B,C</i> | <i>HLA-A</i> | <i>HLA-B</i> | <i>HLA-C</i> | <i>HLA-A,B,C</i> |
| Optitype   | 0.973        | 0.966        | 0.977        | <b>0.972</b>     | 0.996        | 0.989        | 0.997        | <b>0.994</b>     |
| Polysolver | 0.934        | 0.925        | 0.961        | <b>0.940</b>     | 0.959        | 0.961        | 0.979        | <b>0.967</b>     |
| PHLAT      | 0.791        | 0.851        | 0.928        | <b>0.856</b>     | 0.870        | 0.942        | 0.979        | <b>0.930</b>     |



**Supplementary Table 7. Discordant alleles of *HLA-A* in Optitype prediction.**

| Experimental typing |           | Predicted data |           | 2nd field      |            |               | 1st field      |            |                |
|---------------------|-----------|----------------|-----------|----------------|------------|---------------|----------------|------------|----------------|
| 2nd field           | 1st field | 2nd field      | 1st field | No of miscalls | Error rate | <i>P</i>      | No of miscalls | Error rate | <i>P</i>       |
| A*01:01             | A*01      | A*01:02        | A*01      | 1              | 0.9%       | 1.0           | 1              | 0.8%       | 1.0            |
| A*02:01             | A*02      | A*02:07        | A*02      | 10             | 2.7%       | <b>0.0018</b> | 31             | 5.9%       | <b>5.9E-10</b> |
| A*02:01             | A*02      | A*02:02        | A*02      | 1              | 0.3%       | 1.0           |                |            |                |
| A*02:01             | A*02      | A*02:06        | A*02      | 3              | 0.8%       | 0.25          |                |            |                |
| A*02:01             | A*02      | A*02:17        | A*02      | 1              | 0.3%       | 1.0           |                |            |                |
| A*02:01             | A*02      | A*02:20        | A*02      | 1              | 0.3%       | 1.0           |                |            |                |
| A*02:01             | A*02      | A*02:22        | A*02      | 1              | 0.3%       | 1.0           |                |            |                |
| A*02:01             | A*02      | A*02:64        | A*02      | 1              | 0.3%       | 1.0           |                |            |                |
| A*02:01             | A*02      | A*02:74        | A*02      | 2              | 0.5%       | 0.50          |                |            |                |
| A*02:06             | A*02      | A*02:01        | A*02      | 7              | 18.4%      | <b>0.012</b>  |                |            |                |
| A*02:06             | A*02      | A*02:07        | A*02      | 1              | 2.6%       | 1.0           |                |            |                |
| A*02:06             | A*02      | A*02:10        | A*02      | 1              | 2.6%       | 1.0           |                |            |                |
| A*02:147            | A*02      | A*02:74        | A*02      | 1              | 100.0%     | 1.0           |                |            |                |
| A*02:22             | A*02      | A*02:05        | A*02      | 1              | 50.0%      | 1.0           |                |            |                |
| A*02:01             | A*02      | A*69:01        | A*69      | 1              | 0.3%       | 1.0           |                |            |                |
| A*03:01             | A*03      | A*03:12        | A*03      | 1              | 0.5%       | 1.0           | 1              | 0.5%       | 1.0            |
| A*11:01             | A*11      | A*11:02        | A*11      | 1              | 0.6%       | 1.0           | 2              | 1.1%       | 0.50           |
| A*11:01             | A*11      | A*11:12        | A*11      | 1              | 0.6%       | 1.0           |                |            |                |
| A*24:20             | A*24      | A*24:02        | A*24      | 1              | 100.0%     | 1.0           | 1              | 0.4%       | 1.0            |
| A*26:01             | A*26      | A*02:01        | A*02      | 1              | 2.0%       | 1.0           | 1              | 1.6%       | 1.0            |
| A*26:01             | A*26      | A*25:01        | A*25      | 2              | 4.1%       | 0.49          | 2              | 3.3%       | 0.50           |
| A*26:01             | A*26      | A*26:02        | A*26      | 1              | 2.0%       | 1.0           |                |            |                |
| A*26:03             | A*26      | A*26:06        | A*26      | 1              | 14.3%      | 1.0           | 3              | 5.1%       | 0.24           |
| A*29:02             | A*29      | A*29:01        | A*29      | 3              | 5.7%       | 0.24          |                |            |                |
| A*31:01             | A*31      | A*33:03        | A*33      | 1              | 1.5%       | 1.0           | 1              | 1.4%       | 1.0            |
| A*33:03             | A*33      | A*31:01        | A*31      | 1              | 1.6%       | 1.0           | 1              | 1.4%       | 1.0            |
| A*33:03             | A*33      | A*33:01        | A*33      | 1              | 1.6%       | 1.0           | 1              | 1.4%       | 1.0            |
| A*36:01             | A*36      | A*01:01        | A*01      | 1              | 4.8%       | 1.0           | 1              | 4.8%       | 1.0            |
| A*68:01             | A*68      | A*68:04        | A*68      | 1              | 1.9%       | 1.0           | 2              | 2.2%       | 0.50           |
| A*68:01             | A*68      | A*68:08        | A*68      | 1              | 1.9%       | 1.0           |                |            |                |

**Supplementary Table 8. Discordant alleles of *HLA-B* in Optitype prediction.**

| Experimental typing |           | Predicted data |           | 2nd field      |            |              | 1st field      |            |               |
|---------------------|-----------|----------------|-----------|----------------|------------|--------------|----------------|------------|---------------|
| 2nd field           | 1st field | 2nd field      | 1st field | No of miscalls | Error rate | <i>P</i>     | No of miscalls | Error rate | <i>P</i>      |
| B*07:02             | B*07      | B*07:05        | B*07      | 1              | 0.7%       | 1.0          | 2              | 1.4%       | 0.50          |
| B*07:02             | B*07      | B*07:33        | B*07      | 1              | 0.7%       | 1.0          |                |            |               |
| B*08:01             | B*08      | B*08:12        | B*08      | 1              | 1.4%       | 1.0          | 1              | 1.4%       | 1.0           |
| B*08:01             | B*08      | B*42:01        | B*42      | 1              | 1.4%       | 1.0          | 1              | 1.4%       | 1.0           |
| B*13:01             | B*13      | B*13:02        | B*13      | 1              | 4.3%       | 1.0          | 7              | 10.0%      | <b>0.013</b>  |
| B*13:02             | B*13      | B*13:01        | B*13      | 6              | 12.8%      | <b>0.026</b> |                |            |               |
| B*14:01             | B*14      | B*14:02        | B*14      | 2              | 22.2%      | 0.47         | 2              | 4.3%       | 0.49          |
| B*15:01             | B*15      | B*15:34        | B*15      | 1              | 1.4%       | 1.0          | 2              | 1.1%       | 0.50          |
| B*15:18             | B*15      | B*15:03        | B*15      | 1              | 8.3%       | 1.0          |                |            |               |
| B*15:01             | B*15      | B*51:01        | B*51      | 1              | 1.4%       | 1.0          | 1              | 0.6%       | 1.0           |
| B*18:01             | B*18      | B*35:01        | B*35      | 1              | 1.9%       | 1.0          | 1              | 1.8%       | 1.0           |
| B*27:03             | B*27      | B*27:05        | B*27      | 3              | 75.0%      | 0.14         | 3              | 7.0%       | 0.24          |
| B*35:03             | B*35      | B*15:01        | B*15      | 1              | 4.5%       | 1.0          | 1              | 0.5%       | 1.0           |
| B*35:01             | B*35      | B*35:02        | B*35      | 1              | 0.8%       | 1.0          | 8              | 4.0%       | <b>0.0073</b> |
| B*35:01             | B*35      | B*35:08        | B*35      | 1              | 0.8%       | 1.0          |                |            |               |
| B*35:01             | B*35      | B*35:14        | B*35      | 1              | 0.8%       | 1.0          |                |            |               |
| B*35:01             | B*35      | B*35:51        | B*35      | 1              | 0.8%       | 1.0          |                |            |               |
| B*35:17             | B*35      | B*35:01        | B*35      | 1              | 14.3%      | 1.0          |                |            |               |
| B*35:43             | B*35      | B*35:11        | B*35      | 1              | 10.0%      | 1.0          | 1              | 0.5%       | 1.0           |
| B*35:43             | B*35      | B*35:14        | B*35      | 2              | 20.0%      | 0.47         |                |            |               |
| B*35:01             | B*35      | B*51:01        | B*51      | 1              | 0.8%       | 1.0          | 1              | 0.5%       | 1.0           |
| B*39:03             | B*39      | B*39:24        | B*39      | 1              | 100.0%     | 1.0          | 3              | 4.7%       | 0.24          |
| B*39:06             | B*39      | B*39:01        | B*39      | 2              | 12.5%      | 0.48         |                |            |               |
| B*40:01             | B*40      | B*35:03        | B*35      | 1              | 0.9%       | 1.0          | 1              | 0.5%       | 1.0           |
| B*40:04             | B*40      | B*40:02        | B*40      | 1              | 25.0%      | 1.0          | 7              | 3.7%       | <b>0.015</b>  |
| B*40:06             | B*40      | B*40:02        | B*40      | 5              | 31.3%      | <b>0.043</b> |                |            |               |
| B*40:20             | B*40      | B*40:03        | B*40      | 1              | 100.0%     | 1.0          |                |            |               |
| B*40:02             | B*40      | B*44:09        | B*44      | 1              | 1.9%       | 1.0          | 1              | 0.5%       | 1.0           |
| B*41:02             | B*41      | B*08:01        | B*08      | 1              | 16.7%      | 1.0          | 1              | 6.3%       | 1.0           |
| B*41:02             | B*41      | B*41:03        | B*41      | 1              | 16.7%      | 1.0          | 2              | 12.5%      | 0.48          |
| B*41:04             | B*41      | B*41:02        | B*41      | 1              | 100.0%     | 1.0          |                |            |               |
| B*42:02             | B*42      | B*42:01        | B*42      | 1              | 33.3%      | 1.0          | 1              | 3.4%       | 1.0           |
| B*44:03             | B*44      | B*15:01        | B*15      | 1              | 1.2%       | 1.0          | 1              | 0.6%       | 1.0           |
| B*44:03             | B*44      | B*40:02        | B*40      | 1              | 1.2%       | 1.0          | 1              | 0.6%       | 1.0           |
| B*44:03             | B*44      | B*44:02        | B*44      | 1              | 1.2%       | 1.0          | 1              | 0.6%       | 1.0           |
| B*44:02             | B*44      | B*83:01        | B*83      | 1              | 1.3%       | 1.0          | 1              | 0.6%       | 1.0           |
| B*45:01             | B*45      | B*44:09        | B*44      | 1              | 3.3%       | 1.0          | 4              | 13.3%      | 0.11          |
| B*45:01             | B*45      | B*44:15        | B*44      | 3              | 10.0%      | 0.24         |                |            |               |
| B*45:01             | B*45      | B*45:04        | B*45      | 1              | 3.3%       | 1.0          | 1              | 3.3%       | 1.0           |
| B*45:01             | B*45      | B*82:02        | B*82      | 1              | 3.3%       | 1.0          | 1              | 3.3%       | 1.0           |
| B*51:02             | B*51      | B*51:01        | B*51      | 1              | 25.0%      | 1.0          | 2              | 1.8%       | 0.50          |
| B*51:23             | B*51      | B*51:02        | B*51      | 1              | 100.0%     | 1.0          |                |            |               |
| B*52:01             | B*52      | B*51:01        | B*51      | 1              | 2.1%       | 1.0          | 1              | 2.1%       | 1.0           |
| B*58:01             | B*58      | B*35:01        | B*35      | 1              | 1.8%       | 1.0          | 2              | 2.6%       | 0.50          |
| B*58:01             | B*58      | B*35:28        | B*35      | 1              | 1.8%       | 1.0          |                |            |               |
| B*58:01             | B*58      | B*44:02        | B*44      | 1              | 1.8%       | 1.0          | 1              | 1.3%       | 1.0           |
| B*58:01             | B*58      | B*53:01        | B*53      | 1              | 1.8%       | 1.0          | 2              | 2.6%       | 0.50          |
| B*58:02             | B*58      | B*53:01        | B*53      | 1              | 5.3%       | 1.0          |                |            |               |
| B*58:02             | B*58      | B*58:01        | B*58      | 1              | 5.3%       | 1.0          | 1              | 1.3%       | 1.0           |

**Supplementary Table 9. Discordant alleles of *HLA-C* in Optitype prediction.**

| Experimental typing |           | Predicted data |           |                |            |              | 1st field      |            |                |
|---------------------|-----------|----------------|-----------|----------------|------------|--------------|----------------|------------|----------------|
| 2nd field           | 1st field | 2nd field      | 1st field | No of miscalls | Error rate | <i>P</i>     | No of miscalls | Error rate | <i>P</i>       |
| C*01:02             | C*01      | C*01:03        | C*01      | 1              | 0.7%       | 1.0          | 1              | 0.7%       | 1.0            |
| C*02:02             | C*02      | C*02:08        | C*02      | 1              | 2.3%       | 1.0          | 6              | 9.5%       | <b>0.028</b>   |
| C*02:02             | C*02      | C*02:10        | C*02      | 5              | 11.6%      | 0.055        |                |            |                |
| C*03:02             | C*03      | C*03:04        | C*03      | 1              | 2.6%       | 1.0          |                |            |                |
| C*03:03             | C*03      | C*03:02        | C*03      | 1              | 1.0%       | 1.0          | 17             | 5.4%       | <b>5.9E-06</b> |
| C*03:03             | C*03      | C*03:04        | C*03      | 5              | 4.9%       | 0.059        |                |            |                |
| C*03:03             | C*03      | C*03:81        | C*03      | 1              | 1.0%       | 1.0          |                |            |                |
| C*03:04             | C*03      | C*03:02        | C*03      | 1              | 0.6%       | 1.0          |                |            |                |
| C*03:04             | C*03      | C*03:03        | C*03      | 6              | 3.7%       | <b>0.030</b> |                |            |                |
| C*03:04             | C*03      | C*03:07        | C*03      | 1              | 0.6%       | 1.0          |                |            |                |
| C*03:36             | C*03      | C*03:02        | C*03      | 1              | 100.0%     | 1.0          |                |            |                |
| C*03:04             | C*03      | C*04:01        | C*04      | 1              | 0.6%       | 1.0          | 1              | 0.3%       | 1.0            |
| C*04:01             | C*04      | C*04:03        | C*04      | 1              | 0.4%       | 1.0          | 2              | 0.8%       | 0.50           |
| C*04:01             | C*04      | C*04:07        | C*04      | 1              | 0.4%       | 1.0          |                |            |                |
| C*05:01             | C*05      | C*05:09        | C*05      | 1              | 1.1%       | 1.0          | 1              | 1.1%       | 1.0            |
| C*05:01             | C*05      | C*08:02        | C*08      | 1              | 1.1%       | 1.0          | 1              | 1.1%       | 1.0            |
| C*06:02             | C*06      | C*06:06        | C*06      | 1              | 0.7%       | 1.0          | 1              | 0.7%       | 1.0            |
| C*07:01             | C*07      | C*07:14        | C*07      | 1              | 0.7%       | 1.0          | 4              | 1.0%       | 0.12           |
| C*07:02             | C*07      | C*07:56        | C*07      | 1              | 0.4%       | 1.0          |                |            |                |
| C*07:02             | C*07      | C*07:01        | C*07      | 1              | 0.4%       | 1.0          |                |            |                |
| C*07:02             | C*07      | C*07:19        | C*07      | 1              | 0.4%       | 1.0          |                |            |                |
| C*08:02             | C*08      | C*05:01        | C*05      | 2              | 4.1%       | 0.49         | 2              | 1.7%       | 0.50           |
| C*08:01             | C*08      | C*08:03        | C*08      | 2              | 4.1%       | 0.49         |                |            |                |
| C*08:02             | C*08      | C*08:04        | C*08      | 1              | 2.0%       | 1.0          | 3              | 2.6%       | 0.25           |
| C*12:03             | C*12      | C*12:02        | C*12      | 1              | 1.6%       | 1.0          |                |            |                |
| C*12:03             | C*12      | C*12:05        | C*12      | 1              | 1.6%       | 1.0          | 2              | 2.0%       | 0.50           |
| C*14:02             | C*14      | C*06:02        | C*06      | 1              | 2.1%       | 1.0          | 1              | 1.6%       | 1.0            |
| C*14:03             | C*14      | C*14:02        | C*14      | 2              | 13.3%      | 0.48         | 2              | 3.2%       | 0.50           |
| C*16:02             | C*16      | C*16:01        | C*16      | 1              | 20.0%      | 1.0          | 1              | 1.1%       | 1.0            |

**Supplementary Table 10. Discordant alleles of HLA-A in Polysolver prediction.**

| Experimental typing |           | Predicted data |           |                |              |                | 1st field      |            |                |
|---------------------|-----------|----------------|-----------|----------------|--------------|----------------|----------------|------------|----------------|
| 2nd field           | 1st field | 2nd field      | 1st field | No of miscalls | Error rate   | <i>P</i>       | No of miscalls | Error rate | <i>P</i>       |
| A*01:02             | A*01      | A*01:01        | A*01      | 1              | 25.0%        | 1.0            | 1              | 0.8%       | 1.0            |
| A*02:01             | A*02      | A*01:01        | A*01      | 1              | 0.3%         | 1.0            | 34             | 6.5%       | <b>6.7E-11</b> |
| A*02:01             | A*02      | A*01:02        | A*01      | 2              | 0.5%         | 0.50           |                |            |                |
| A*02:01             | A*02      | A*02:07        | A*02      | 9              | 2.4%         | <b>0.0037</b>  |                |            |                |
| A*02:01             | A*02      | A*02:03        | A*02      | 2              | 0.5%         | 0.50           |                |            |                |
| A*02:01             | A*02      | A*02:06        | A*02      | 1              | 0.3%         | 1.0            |                |            |                |
| A*02:02             | A*02      | A*02:01        | A*02      | 1              | 4.2%         | 1.0            |                |            |                |
| A*02:02             | A*02      | A*02:05        | A*02      | 1              | 4.2%         | 1.0            |                |            |                |
| A*02:05             | A*02      | A*02:02        | A*02      | 1              | 6.3%         | 1.0            |                |            |                |
| A*02:06             | A*02      | A*02:01        | A*02      | 5              | 13.2%        | 0.054          |                |            |                |
| A*02:06             | A*02      | A*02:03        | A*02      | 1              | 2.6%         | 1.0            |                |            |                |
| A*02:06             | A*02      | A*02:07        | A*02      | 1              | 2.6%         | 1.0            |                |            |                |
| A*02:06             | A*02      | A*02:10        | A*02      | 1              | 2.6%         | 1.0            |                |            |                |
| A*02:11             | A*02      | A*02:01        | A*02      | 5              | 83.3%        | <b>0.015</b>   |                |            |                |
| A*02:14             | A*02      | A*02:05        | A*02      | 1              | 100.0%       | 1.0            |                |            |                |
| A*02:147            | A*02      | A*02:01        | A*02      | 1              | 100.0%       | 1.0            |                |            |                |
| A*02:20             | A*02      | A*02:01        | A*02      | 2              | 100.0%       | 0.33           |                |            |                |
| A*02:22             | A*02      | A*02:01        | A*02      | 1              | 50.0%        | 1.0            |                |            |                |
| A*02:22             | A*02      | A*02:02        | A*02      | 1              | 50.0%        | 1.0            |                |            |                |
| A*02:01             | A*02      | A*03:01        | A*03      | 2              | 0.5%         | 0.50           | 2              | 0.4%       | 0.50           |
| A*02:01             | A*02      | A*11:01        | A*11      | 1              | 0.3%         | 1.0            | 1              | 0.2%       | 1.0            |
| A*02:01             | A*02      | A*24:02        | A*24      | 2              | 0.5%         | 0.50           | 4              | 0.8%       | 0.12           |
| A*02:06             | A*02      | A*24:02        | A*24      | 2              | 5.3%         | 0.49           |                |            |                |
| A*02:01             | A*02      | A*26:01        | A*26      | 1              | 0.3%         | 1.0            | 1              | 0.2%       | 1.0            |
| A*02:01             | A*02      | A*30:01        | A*30      | 2              | 0.5%         | 0.50           | 8              | 1.5%       | <b>0.0076</b>  |
| A*02:01             | A*02      | A*30:02        | A*30      | 3              | 0.8%         | 0.25           |                |            |                |
| A*02:01             | A*02      | A*30:04        | A*30      | 1              | 0.3%         | 1.0            |                |            |                |
| A*02:02             | A*02      | A*30:01        | A*30      | 1              | 4.2%         | 1.0            |                |            |                |
| A*02:07             | A*02      | A*30:01        | A*30      | 1              | 2.9%         | 1.0            |                |            |                |
| A*02:01             | A*02      | A*32:01        | A*32      | 1              | 0.3%         | 1.0            | 1              | 0.2%       | 1.0            |
| A*02:11             | A*02      | A*36:01        | A*36      | 1              | 16.7%        | 1.0            | 1              | 0.2%       | 1.0            |
| A*02:01             | A*02      | A*69:01        | A*69      | 2              | 0.5%         | 0.50           | 2              | 0.4%       | 0.50           |
| A*03:01             | A*03      | A*01:01        | A*01      | 1              | 0.5%         | 1.0            | 1              | 0.5%       | 1.0            |
| A*03:01             | A*03      | A*02:01        | A*02      | 2              | 1.1%         | 0.50           | 2              | 1.0%       | 0.50           |
| A*03:02             | A*03      | A*03:01        | A*03      | 1              | 25.0%        | 1.0            | 1              | 0.5%       | 1.0            |
| A*03:01             | A*03      | A*24:02        | A*24      | 1              | 0.5%         | 1.0            | 2              | 1.0%       | 0.50           |
| A*03:02             | A*03      | A*24:02        | A*24      | 1              | 25.0%        | 1.0            |                |            |                |
| A*03:01             | A*03      | A*30:01        | A*30      | 1              | 0.5%         | 1.0            | 2              | 1.0%       | 0.50           |
| A*03:01             | A*03      | A*30:04        | A*30      | 1              | 0.5%         | 1.0            |                |            |                |
| A*11:01             | A*11      | A*11:02        | A*11      | 1              | 0.6%         | 1.0            | 2              | 1.1%       | 0.50           |
| A*11:01             | A*11      | A*11:12        | A*11      | 1              | 0.6%         | 1.0            |                |            |                |
| A*11:01             | A*11      | A*24:02        | A*24      | 2              | 1.2%         | 0.50           | 2              | 1.1%       | 0.50           |
| A*11:01             | A*11      | A*30:02        | A*30      | 1              | 0.6%         | 1.0            | 1              | 0.6%       | 1.0            |
| A*24:02             | A*24      | A*01:01        | A*01      | 1              | 0.4%         | 1.0            | 1              | 0.4%       | 1.0            |
| A*24:24             | A*24      | A*23:01        | A*23      | 1              | 100.0%       | 1.0            | 1              | 0.4%       | 1.0            |
| A*24:04             | A*24      | A*24:02        | A*24      | 2              | 100.0%       | 0.33           | 3              | 1.2%       | 0.25           |
| A*24:08             | A*24      | A*24:20        | A*24      | 1              | 100.0%       | 1.0            |                |            |                |
| A*24:02             | A*24      | A*30:01        | A*30      | 1              | 0.4%         | 1.0            | 1              | 0.4%       | 1.0            |
| A*25:01             | A*25      | A*26:01        | A*26      | <b>14</b>      | <b>93.3%</b> | <b>2.1E-07</b> | 14             | 93.3%      | <b>2.1E-07</b> |
| A*26:01             | A*26      | A*01:01        | A*01      | 1              | 2.0%         | 1.0            | 1              | 1.6%       | 1.0            |
| A*26:01             | A*26      | A*24:02        | A*24      | 1              | 2.0%         | 1.0            | 1              | 1.6%       | 1.0            |
| A*26:01             | A*26      | A*26:02        | A*26      | 2              | 4.1%         | 0.49           | 4              | 6.6%       | 0.12           |
| A*26:08             | A*26      | A*26:01        | A*26      | 2              | 66.7%        | 0.40           |                |            |                |
| A*29:02             | A*29      | A*01:01        | A*01      | 2              | 3.8%         | 0.50           | 2              | 3.4%       | 0.50           |
| A*29:02             | A*29      | A*03:01        | A*03      | 3              | 5.7%         | 0.24           | 3              | 5.1%       | 0.24           |
| A*29:02             | A*29      | A*24:02        | A*24      | 1              | 1.9%         | 1.0            | 1              | 1.7%       | 1.0            |
| A*29:02             | A*29      | A*29:01        | A*29      | 1              | 1.9%         | 1.0            | 1              | 1.7%       | 1.0            |
| A*29:02             | A*29      | A*30:02        | A*30      | 1              | 1.9%         | 1.0            | 1              | 1.7%       | 1.0            |
| A*30:01             | A*30      | A*30:02        | A*30      | 1              | 1.6%         | 1.0            | 2              | 1.7%       | 0.50           |
| A*30:10             | A*30      | A*30:02        | A*30      | 1              | 100.0%       | 1.0            |                |            |                |
| A*31:01             | A*31      | A*24:02        | A*24      | 1              | 1.5%         | 1.0            | 1              | 1.4%       | 1.0            |
| A*31:01             | A*31      | A*33:03        | A*33      | 1              | 1.5%         | 1.0            | 1              | 1.4%       | 1.0            |
| A*32:01             | A*32      | A*11:01        | A*11      | 1              | 2.4%         | 1.0            | 1              | 2.4%       | 1.0            |

|         |      |         |      |   |        |      |     |       |       |
|---------|------|---------|------|---|--------|------|-----|-------|-------|
| A*32:01 | A*32 | A*30:01 | A*30 | 1 | 2.4%   | 1.0  | 1   | 2.4%  | 1.0   |
| A*33:03 | A*33 | A*24:02 | A*24 | 1 | 1.6%   | 1.0  | 1   | 1.4%  | 1.0   |
| A*33:03 | A*33 | A*30:01 | A*30 | 1 | 1.6%   | 1.0  | 1   | 1.4%  | 1.0   |
| A*34:02 | A*34 | A*30:02 | A*30 | 1 | 8.3%   | 1.0  | 1   | 8.3%  | 1.0   |
| A*66:01 | A*66 | A*30:02 | A*30 | 1 | 8.3%   | 1.0  | 1   | 5.0%  | 1.0   |
| A*68:02 | A*68 | A*01:01 | A*01 | 1 | 2.9%   | 1.0  | 1   | 1.1%  | 1.0   |
| A*68:01 | A*68 | A*02:03 | A*02 | 1 | 1.9%   | 1.0  | 1   | 1.1%  | 1.0   |
| A*68:01 | A*68 | A*11:01 | A*11 | 1 | 1.9%   | 1.0  | 1   | 1.1%  | 1.0   |
| A*68:01 | A*68 | A*26:01 | A*26 | 1 | 1.9%   | 1.0  | 1   | 1.1%  | 1.0   |
| A*68:01 | A*68 | A*30:01 | A*30 | 1 | 1.9%   | 1.0  | ] 5 | 5.6%  | 0.059 |
| A*68:01 | A*68 | A*30:02 | A*30 | 2 | 3.8%   | 0.50 |     |       |       |
| A*68:02 | A*68 | A*30:02 | A*30 | 2 | 5.7%   | 0.49 |     |       |       |
| A*68:03 | A*68 | A*68:02 | A*68 | 1 | 100.0% | 1.0  | 1   | 1.1%  | 1.0   |
| A*68:01 | A*68 | A*69:01 | A*69 | 1 | 1.9%   | 1.0  | 1   | 1.1%  | 1.0   |
| A*69:01 | A*69 | A*30:02 | A*30 | 1 | 50.0%  | 1.0  | 1   | 50.0% | 1.0   |

**Supplementary Table 11. Discordant alleles of HLA-B in Polysolver prediction.**

| Experimental typing |           | Predicted data |           | 2nd field      |            |               | 1st field      |            |                |
|---------------------|-----------|----------------|-----------|----------------|------------|---------------|----------------|------------|----------------|
| 2nd field           | 1st field | 2nd field      | 1st field | No of miscalls | Error rate | <i>P</i>      | No of miscalls | Error rate | <i>P</i>       |
| B*13:02             | B*13      | B*07:02        | B*07      | 1              | 2.1%       | 1.0           | 1              | 1.4%       | 1.0            |
| B*13:01             | B*13      | B*13:02        | B*13      | 1              | 4.3%       | 1.0           | 3              | 4.3%       | 0.24           |
| B*13:02             | B*13      | B*13:01        | B*13      | 2              | 4.3%       | 0.49          |                |            |                |
| B*14:02             | B*14      | B*08:01        | B*08      | 1              | 2.7%       | 1.0           | 1              | 2.1%       | 1.0            |
| B*14:01             | B*14      | B*14:02        | B*14      | 1              | 11.1%      | 1.0           | 6              | 12.8%      | <b>0.026</b>   |
| B*14:02             | B*14      | B*14:01        | B*14      | 5              | 13.5%      | 0.054         |                |            |                |
| B*15:01             | B*15      | B*07:02        | B*07      | 1              | 1.4%       | 1.0           | 1              | 0.6%       | 1.0            |
| B*15:01             | B*15      | B*15:05        | B*15      | 1              | 1.4%       | 1.0           | 7              | 4.0%       | <b>0.015</b>   |
| B*15:01             | B*15      | B*15:07        | B*15      | 1              | 1.4%       | 1.0           |                |            |                |
| B*15:09             | B*15      | B*15:18        | B*15      | 1              | 100.0%     | 1.0           |                |            |                |
| B*15:10             | B*15      | B*15:18        | B*15      | 2              | 11.8%      | 0.48          |                |            |                |
| B*15:15             | B*15      | B*15:01        | B*15      | 1              | 33.3%      | 1.0           | 3              | 1.7%       | 0.25           |
| B*15:15             | B*15      | B*15:08        | B*15      | 1              | 33.3%      | 1.0           |                |            |                |
| B*15:01             | B*15      | B*46:01        | B*46      | 2              | 2.7%       | 0.50          | 1              | 0.6%       | 1.0            |
| B*15:15             | B*15      | B*46:01        | B*46      | 1              | 33.3%      | 1.0           |                |            |                |
| B*15:01             | B*15      | B*51:01        | B*51      | 1              | 1.4%       | 1.0           | 1              | 0.6%       | 1.0            |
| B*15:01             | B*15      | B*55:01        | B*55      | 1              | 1.4%       | 1.0           | 1              | 0.6%       | 1.0            |
| B*18:05             | B*18      | B*18:01        | B*18      | 1              | 100.0%     | 1.0           | 2              | 3.5%       | 0.50           |
| B*18:06             | B*18      | B*18:01        | B*18      | 1              | 100.0%     | 1.0           |                |            |                |
| B*18:01             | B*18      | B*42:01        | B*42      | 1              | 1.9%       | 1.0           | 1              | 1.8%       | 1.0            |
| B*27:05             | B*27      | B*08:01        | B*08      | 1              | 2.9%       | 1.0           | 1              | 2.3%       | 1.0            |
| B*27:05             | B*27      | B*14:01        | B*14      | 1              | 2.9%       | 1.0           | 1              | 2.3%       | 1.0            |
| B*27:05             | B*27      | B*15:01        | B*15      | 1              | 2.9%       | 1.0           | 1              | 2.3%       | 1.0            |
| B*27:03             | B*27      | B*27:05        | B*27      | 1              | 25.0%      | 1.0           | 4              | 9.3%       | 0.12           |
| B*27:03             | B*27      | B*27:05        | B*27      | 2              | 25.0%      | 1.0           |                |            |                |
| B*27:07             | B*27      | B*27:05        | B*27      | 1              | 100.0%     | 1.0           | 1              | 2.3%       | 1.0            |
| B*27:05             | B*27      | B*47:01        | B*47      | 1              | 2.9%       | 1.0           |                |            |                |
| B*27:04             | B*27      | B*54:01        | B*54      | 1              | 25.0%      | 1.0           | 1              | 2.3%       | 1.0            |
| B*35:17             | B*35      | B*07:02        | B*07      | 1              | 14.3%      | 1.0           | 1              | 0.5%       | 1.0            |
| B*35:12             | B*35      | B*15:08        | B*15      | 1              | 20.0%      | 1.0           | 7              | 3.5%       | <b>0.015</b>   |
| B*35:43             | B*35      | B*15:08        | B*15      | 5              | 50.0%      | <b>0.033</b>  |                |            |                |
| B*35:43             | B*35      | B*15:46        | B*15      | 1              | 10.0%      | 1.0           |                |            |                |
| B*35:01             | B*35      | B*35:02        | B*35      | 1              | 0.8%       | 1.0           |                |            |                |
| B*35:03             | B*35      | B*35:01        | B*35      | 1              | 4.5%       | 1.0           | 17             | 8.6%       | <b>1.1E-05</b> |
| B*35:10             | B*35      | B*35:01        | B*35      | 1              | 50.0%      | 1.0           |                |            |                |
| B*35:11             | B*35      | B*35:01        | B*35      | 2              | 100.0%     | 0.33          |                |            |                |
| B*35:12             | B*35      | B*35:02        | B*35      | 4              | 80.0%      | <b>0.048</b>  |                |            |                |
| B*35:14             | B*35      | B*35:01        | B*35      | 1              | 100.0%     | 1.0           | 6              | 7.8%       | 0.058          |
| B*35:17             | B*35      | B*35:01        | B*35      | 6              | 85.7%      | <b>0.0047</b> |                |            |                |
| B*35:43             | B*35      | B*35:01        | B*35      | 1              | 10.0%      | 1.0           |                |            |                |
| B*35:43             | B*35      | B*44:02        | B*44      | 1              | 10.0%      | 1.0           |                |            |                |
| B*35:43             | B*35      | B*49:01        | B*49      | 1              | 10.0%      | 1.0           | 1              | 0.5%       | 1.0            |
| B*35:43             | B*35      | B*50:01        | B*50      | 1              | 10.0%      | 1.0           | 1              | 0.5%       | 1.0            |
| B*35:01             | B*35      | B*51:01        | B*51      | 1              | 0.8%       | 1.0           | 1              | 0.5%       | 1.0            |
| B*35:01             | B*35      | B*52:01        | B*52      | 1              | 0.8%       | 1.0           | 1              | 0.5%       | 1.0            |
| B*35:10             | B*35      | B*53:01        | B*53      | 1              | 50.0%      | 1.0           | 1              | 0.5%       | 1.0            |
| B*39:05             | B*39      | B*38:01        | B*38      | 3              | 42.9%      | 0.19          | 6              | 7.8%       | 0.058          |
| B*39:11             | B*39      | B*38:01        | B*38      | 3              | 50.0%      | 0.43          |                |            |                |
| B*39:03             | B*39      | B*39:01        | B*39      | 1              | 100.0%     | 1.0           | 7              | 10.9%      | <b>0.013</b>   |
| B*39:05             | B*39      | B*39:01        | B*39      | 4              | 57.1%      | <b>0.070</b>  |                |            |                |
| B*39:06             | B*39      | B*39:01        | B*39      | 1              | 6.3%       | 1.0           |                |            |                |
| B*39:08             | B*39      | B*39:02        | B*39      | 1              | 100.0%     | 1.0           |                |            |                |
| B*39:11             | B*39      | B*40:02        | B*40      | 1              | 25.0%      | 1.0           | 1              | 1.6%       | 1.0            |
| B*40:01             | B*40      | B*07:02        | B*07      | 1              | 0.9%       | 1.0           | 1              | 0.5%       | 1.0            |
| B*40:06             | B*40      | B*13:02        | B*13      | 1              | 6.3%       | 1.0           | 1              | 0.5%       | 1.0            |
| B*40:01             | B*40      | B*35:03        | B*35      | 1              | 0.9%       | 1.0           | 2              | 1.0%       | 0.50           |
| B*40:04             | B*40      | B*35:02        | B*35      | 1              | 25.0%      | 1.0           |                |            |                |
| B*40:02             | B*40      | B*40:14        | B*40      | 1              | 1.9%       | 1.0           | 9              | 4.7%       | <b>0.0035</b>  |
| B*40:04             | B*40      | B*40:02        | B*40      | 3              | 75.0%      | 0.14          |                |            |                |
| B*40:06             | B*40      | B*40:02        | B*40      | 4              | 25.0%      | 0.10          |                |            |                |
| B*40:20             | B*40      | B*40:03        | B*40      | 1              | 100.0%     | 1.0           |                |            |                |
| B*40:02             | B*40      | B*44:03        | B*44      | 1              | 1.9%       | 1.0           | 1              | 0.5%       | 1.0            |
| B*40:02             | B*40      | B*51:01        | B*51      | 1              | 1.9%       | 1.0           | 1              | 0.5%       | 1.0            |

|         |      |         |      |   |        |      |   |       |      |       |
|---------|------|---------|------|---|--------|------|---|-------|------|-------|
| B*41:02 | B*41 | B*14:01 | B*14 | 1 | 16.7%  | 1.0  | 1 | 6.3%  | 1.0  |       |
| B*41:02 | B*41 | B*41:03 | B*41 | 1 | 16.7%  | 1.0  | 1 | 6.3%  | 1.0  |       |
| B*41:04 | B*41 | B*42:01 | B*42 | 1 | 100.0% | 1.0  | 1 | 6.3%  | 1.0  |       |
| B*42:02 | B*42 | B*42:01 | B*42 | 2 | 66.7%  | 0.40 | 2 | 6.9%  | 0.49 |       |
| B*44:03 | B*44 | B*07:05 | B*07 | 1 | 1.2%   | 1.0  | 1 | 0.6%  | 1.0  |       |
| B*44:02 | B*44 | B*08:01 | B*08 | 1 | 1.3%   | 1.0  | 1 | 0.6%  | 1.0  |       |
| B*44:02 | B*44 | B*18:01 | B*18 | 1 | 1.3%   | 1.0  | 1 | 0.6%  | 1.0  |       |
| B*44:02 | B*44 | B*35:01 | B*35 | 1 | 1.3%   | 1.0  | 1 | 0.6%  | 1.0  |       |
| B*44:02 | B*44 | B*40:02 | B*40 | 1 | 1.3%   | 1.0  | } | 2     | 1.2% | 0.50  |
| B*44:03 | B*44 | B*40:02 | B*40 | 1 | 1.2%   | 1.0  |   |       |      |       |
| B*44:03 | B*44 | B*44:02 | B*44 | 1 | 1.2%   | 1.0  |   |       |      |       |
| B*44:03 | B*44 | B*44:15 | B*44 | 1 | 1.2%   | 1.0  | } | 3     | 1.8% | 0.25  |
| B*44:05 | B*44 | B*44:02 | B*44 | 1 | 50.0%  | 1.0  |   |       |      |       |
| B*44:03 | B*44 | B*50:01 | B*50 | 1 | 1.2%   | 1.0  | 1 | 0.6%  | 1.0  |       |
| B*45:01 | B*45 | B*82:02 | B*82 | 1 | 3.3%   | 1.0  | 1 | 3.3%  | 1.0  |       |
| B*46:01 | B*46 | B*15:07 | B*15 | 1 | 1.6%   | 1.0  | 1 | 1.6%  | 1.0  |       |
| B*46:01 | B*46 | B*38:02 | B*38 | 1 | 1.6%   | 1.0  | 1 | 1.6%  | 1.0  |       |
| B*48:05 | B*48 | B*40:16 | B*40 | 1 | 100.0% | 1.0  | 1 | 4.8%  | 1.0  |       |
| B*48:01 | B*48 | B*81:01 | B*81 | 1 | 5.6%   | 1.0  | 1 | 4.8%  | 1.0  |       |
| B*51:01 | B*51 | B*51:02 | B*51 | 1 | 0.9%   | 1.0  | } | 4     | 3.5% | 0.12  |
| B*51:02 | B*51 | B*51:01 | B*51 | 1 | 25.0%  | 1.0  |   |       |      |       |
| B*51:08 | B*51 | B*51:01 | B*51 | 1 | 100.0% | 1.0  |   |       |      |       |
| B*51:23 | B*51 | B*51:02 | B*51 | 1 | 100.0% | 1.0  |   |       |      |       |
| B*52:01 | B*52 | B*51:01 | B*51 | 2 | 4.2%   | 0.49 | 2 | 4.2%  | 0.49 |       |
| B*53:01 | B*53 | B*51:01 | B*51 | 1 | 1.7%   | 1.0  | 1 | 1.7%  | 1.0  |       |
| B*56:01 | B*56 | B*54:01 | B*54 | 1 | 5.3%   | 1.0  | 1 | 5.3%  | 1.0  |       |
| B*57:01 | B*57 | B*08:01 | B*08 | 1 | 2.2%   | 1.0  | 1 | 1.6%  | 1.0  |       |
| B*57:01 | B*57 | B*15:01 | B*15 | 1 | 2.2%   | 1.0  | 1 | 1.6%  | 1.0  |       |
| B*57:01 | B*57 | B*44:02 | B*44 | 1 | 2.2%   | 1.0  | 1 | 1.6%  | 1.0  |       |
| B*57:03 | B*57 | B*53:01 | B*53 | 1 | 7.7%   | 1.0  | 1 | 1.6%  | 1.0  |       |
| B*57:02 | B*57 | B*57:03 | B*57 | 1 | 33.3%  | 1.0  | 1 | 1.6%  | 1.0  |       |
| B*58:01 | B*58 | B*07:02 | B*07 | 1 | 1.8%   | 1.0  | 1 | 1.3%  | 1.0  |       |
| B*58:01 | B*58 | B*35:01 | B*35 | 2 | 3.5%   | 0.50 | } | 3     | 3.9% | 0.25  |
| B*58:02 | B*58 | B*35:01 | B*35 | 1 | 5.3%   | 1.0  |   |       |      |       |
| B*58:01 | B*58 | B*53:01 | B*53 | 3 | 5.3%   | 0.24 |   |       |      |       |
| B*58:02 | B*58 | B*53:01 | B*53 | 2 | 10.5%  | 0.49 | } | 5     | 6.6% | 0.058 |
| B*58:01 | B*58 | B*55:02 | B*55 | 1 | 1.8%   | 1.0  |   |       |      |       |
| B*58:01 | B*58 | B*58:02 | B*58 | 3 | 5.3%   | 0.24 | 3 | 3.9%  | 0.25 |       |
| B*67:01 | B*67 | B*39:01 | B*39 | 1 | 12.5%  | 1.0  | 1 | 12.5% | 1.0  |       |
| B*81:01 | B*81 | B*07:05 | B*07 | 1 | 6.3%   | 1.0  | 1 | 6.3%  | 1.0  |       |

**Supplementary Table 12. Discordant alleles of HLA-C in Polysolver prediction.**

| Experimental typing |           | Predicted data |           | 2nd field      |            |               | 1st field      |            |                |
|---------------------|-----------|----------------|-----------|----------------|------------|---------------|----------------|------------|----------------|
| 2nd field           | 1st field | 2nd field      | 1st field | No of miscalls | Error rate | <i>P</i>      | No of miscalls | Error rate | <i>P</i>       |
| C*01:02             | C*01      | C*01:03        | C*01      | 1              | 0.7%       | 1.0           | 1              | 0.7%       | 1.0            |
| C*01:02             | C*01      | C*07:01        | C*07      | 1              | 0.7%       | 1.0           | 1              | 0.7%       | 1.0            |
| C*01:02             | C*01      | C*14:02        | C*14      | 1              | 0.7%       | 1.0           | 1              | 0.7%       | 1.0            |
| C*02:02             | C*02      | C*02:10        | C*02      | 5              | 11.6%      | 0.055         | 6              | 9.5%       | <b>0.028</b>   |
| C*02:10             | C*02      | C*02:02        | C*02      | 1              | 5.0%       | 1.0           |                |            |                |
| C*03:02             | C*03      | C*01:02        | C*01      | 2              | 5.3%       | 0.49          |                |            |                |
| C*03:03             | C*03      | C*01:02        | C*01      | 1              | 1.0%       | 1.0           |                |            |                |
| C*03:04             | C*03      | C*01:02        | C*01      | 2              | 1.2%       | 0.50          |                |            |                |
| C*03:03             | C*03      | C*02:10        | C*02      | 1              | 1.0%       | 1.0           |                |            |                |
| C*03:04             | C*03      | C*02:02        | C*02      | 1              | 0.6%       | 1.0           |                |            |                |
| C*03:05             | C*03      | C*02:02        | C*02      | 1              | 12.5%      | 1.0           |                |            |                |
| C*03:02             | C*03      | C*03:04        | C*03      | 1              | 2.6%       | 1.0           |                |            |                |
| C*03:03             | C*03      | C*03:04        | C*03      | 1              | 1.0%       | 1.0           |                |            |                |
| C*03:04             | C*03      | C*03:03        | C*03      | 6              | 3.7%       | <b>0.030</b>  | 16             | 5.1%       | <b>2.5E-05</b> |
| C*03:05             | C*03      | C*03:04        | C*03      | 7              | 87.5%      | <b>0.0014</b> |                |            |                |
| C*03:36             | C*03      | C*03:02        | C*03      | 1              | 100.0%     | 1.0           |                |            |                |
| C*03:02             | C*03      | C*04:01        | C*04      | 1              | 2.6%       | 1.0           |                |            |                |
| C*03:03             | C*03      | C*04:01        | C*04      | 1              | 1.0%       | 1.0           |                |            |                |
| C*03:03             | C*03      | C*04:03        | C*04      | 1              | 1.0%       | 1.0           |                |            |                |
| C*03:04             | C*03      | C*04:01        | C*04      | 2              | 1.2%       | 0.50          |                |            |                |
| C*03:04             | C*03      | C*06:02        | C*06      | 2              | 1.2%       | 0.50          |                |            |                |
| C*03:03             | C*03      | C*07:02        | C*07      | 1              | 1.0%       | 1.0           |                |            |                |
| C*03:04             | C*03      | C*07:02        | C*07      | 1              | 0.6%       | 1.0           |                |            |                |
| C*04:01             | C*04      | C*04:03        | C*04      | 1              | 0.4%       | 1.0           | 1              | 0.4%       | 1.0            |
| C*05:01             | C*05      | C*08:02        | C*08      | 1              | 1.1%       | 1.0           | 1              | 1.1%       | 1.0            |
| C*07:01             | C*07      | C*07:02        | C*07      | 1              | 0.7%       | 1.0           | 2              | 0.5%       | 0.50           |
| C*07:02             | C*07      | C*07:01        | C*07      | 1              | 0.4%       | 1.0           |                |            |                |
| C*08:01             | C*08      | C*01:02        | C*01      | 1              | 2.0%       | 1.0           | 1              | 0.9%       | 1.0            |
| C*08:04             | C*08      | C*04:01        | C*04      | 1              | 6.7%       | 1.0           | 1              | 0.9%       | 1.0            |
| C*08:02             | C*08      | C*05:01        | C*05      | 2              | 4.1%       | 0.49          | 2              | 1.7%       | 0.50           |
| C*08:01             | C*08      | C*08:03        | C*08      | 1              | 2.0%       | 1.0           | 1              | 0.9%       | 1.0            |
| C*08:01             | C*08      | C*12:02        | C*12      | 1              | 2.0%       | 1.0           | 1              | 0.9%       | 1.0            |
| C*08:01             | C*08      | C*15:02        | C*15      | 2              | 4.1%       | 0.49          | 2              | 1.7%       | 0.50           |
| C*12:02             | C*12      | C*01:02        | C*01      | 1              | 2.8%       | 1.0           | 2              | 2.0%       | 0.50           |
| C*12:02             | C*12      | C*01:03        | C*01      | 1              | 2.8%       | 1.0           |                |            |                |
| C*12:03             | C*12      | C*04:01        | C*04      | 1              | 1.6%       | 1.0           | 1              | 1.0%       | 1.0            |
| C*12:03             | C*12      | C*07:01        | C*07      | 1              | 1.6%       | 1.0           | 1              | 1.0%       | 1.0            |
| C*12:03             | C*12      | C*12:02        | C*12      | 4              | 6.3%       | 0.12          | 4              | 4.0%       | 0.12           |
| C*12:03             | C*12      | C*14:02        | C*14      | 1              | 1.6%       | 1.0           | 1              | 1.0%       | 1.0            |
| C*14:02             | C*14      | C*07:02        | C*07      | 1              | 2.1%       | 1.0           | 1              | 1.6%       | 1.0            |
| C*14:03             | C*14      | C*14:02        | C*14      | 3              | 20.0%      | 0.22          | 3              | 4.8%       | 0.24           |
| C*14:02             | C*14      | C*16:01        | C*16      | 1              | 2.1%       | 1.0           | 1              | 1.6%       | 1.0            |
| C*16:01             | C*16      | C*03:02        | C*03      | 1              | 1.2%       | 1.0           | 1              | 1.1%       | 1.0            |
| C*16:01             | C*16      | C*04:01        | C*04      | 1              | 1.2%       | 1.0           | 1              | 1.1%       | 1.0            |
| C*16:01             | C*16      | C*07:01        | C*07      | 2              | 2.3%       | 0.50          | 2              | 2.1%       | 0.50           |
| C*16:01             | C*16      | C*15:02        | C*15      | 1              | 1.2%       | 1.0           | 1              | 1.1%       | 1.0            |
| C*16:01             | C*16      | C*16:02        | C*16      | 1              | 1.2%       | 1.0           | 1              | 1.1%       | 1.0            |
| C*18:01             | C*18      | C*04:01        | C*04      | 1              | 8.3%       | 1.0           | 1              | 8.3%       | 1.0            |



**Supplementary Table 13. Discordant alleles of HLA-A in PHLAT prediction.**

| Experimental typing |           | Predicted data |           | 2nd field      |            |                | 1st field      |            |                |
|---------------------|-----------|----------------|-----------|----------------|------------|----------------|----------------|------------|----------------|
| 2nd field           | 1st field | 2nd field      | 1st field | No of miscalls | Error rate | <i>P</i>       | No of miscalls | Error rate | <i>P</i>       |
| A*01:01             | A*01      | A*01:03        | A*01      | 2              | 1.7%       | 0.50           |                |            |                |
| A*01:01             | A*01      | A*01:14        | A*01      | 1              | 0.9%       | 1.0            |                |            |                |
| A*01:01             | A*01      | A*01:22        | A*01      | 5              | 4.3%       | 0.060          |                |            |                |
| A*01:01             | A*01      | A*01:81        | A*01      | 14             | 12.1%      | <b>8.0E-05</b> | 26             | 21.7%      | <b>6.5E-09</b> |
| A*01:02             | A*01      | A*01:20        | A*01      | 2              | 50.0%      | 0.43           |                |            |                |
| A*01:02             | A*01      | A*01:22        | A*01      | 1              | 25.0%      | 1.0            |                |            |                |
| A*01:02             | A*01      | A*01:81        | A*01      | 1              | 25.0%      | 1.0            |                |            |                |
| A*01:01             | A*01      | A*11:50        | A*11      | 1              | 0.9%       | 1.0            | 1              | 0.8%       | 1.0            |
| A*01:01             | A*01      | A*34:01        | A*34      | 2              | 1.7%       | 0.50           | 2              | 1.7%       | 0.50           |
| A*01:01             | A*01      | no data        | no data   | 1              | 0.9%       | 1.0            | 1              | 0.8%       | 1.0            |
| A*02:01             | A*02      | A*01:01        | A*01      | 1              | 0.3%       | 1.0            |                |            |                |
| A*02:01             | A*02      | A*01:22        | A*01      | 25             | 6.6%       | <b>4.0E-08</b> |                |            |                |
| A*02:01             | A*02      | A*01:81        | A*01      | 47             | 12.5%      | <b>3.1E-15</b> |                |            |                |
| A*02:02             | A*02      | A*01:22        | A*01      | 3              | 12.5%      | 0.23           |                |            |                |
| A*02:02             | A*02      | A*01:81        | A*01      | 1              | 4.2%       | 1.0            |                |            |                |
| A*02:03             | A*02      | A*01:22        | A*01      | 1              | 6.3%       | 1.0            |                |            |                |
| A*02:03             | A*02      | A*01:81        | A*01      | 3              | 18.8%      | 0.23           |                |            |                |
| A*02:05             | A*02      | A*01:22        | A*01      | 1              | 6.3%       | 1.0            |                |            |                |
| A*02:05             | A*02      | A*01:81        | A*01      | 1              | 6.3%       | 1.0            |                |            |                |
| A*02:06             | A*02      | A*01:22        | A*01      | 1              | 2.6%       | 1.0            | 101            | 19.3%      | <b>3.8E-33</b> |
| A*02:06             | A*02      | A*01:81        | A*01      | 10             | 26.3%      | <b>0.0010</b>  |                |            |                |
| A*02:07             | A*02      | A*01:81        | A*01      | 1              | 2.9%       | 1.0            |                |            |                |
| A*02:11             | A*02      | A*01:22        | A*01      | 1              | 16.7%      | 1.0            |                |            |                |
| A*02:11             | A*02      | A*01:81        | A*01      | 1              | 16.7%      | 1.0            |                |            |                |
| A*02:14             | A*02      | A*01:81        | A*01      | 1              | 100.0%     | 1.0            |                |            |                |
| A*02:147            | A*02      | A*01:22        | A*01      | 1              | 100.0%     | 1.0            |                |            |                |
| A*02:20             | A*02      | A*01:81        | A*01      | 1              | 50.0%      | 1.0            |                |            |                |
| A*02:22             | A*02      | A*01:81        | A*01      | 1              | 50.0%      | 1.0            |                |            |                |
| A*02:01             | A*02      | A*02:81        | A*02      | 1              | 0.3%       | 1.0            |                |            |                |
| A*02:01             | A*02      | A*02:06        | A*02      | 4              | 1.1%       | 0.12           |                |            |                |
| A*02:01             | A*02      | A*02:07        | A*02      | 4              | 1.1%       | 0.12           |                |            |                |
| A*02:01             | A*02      | A*02:269       | A*02      | 6              | 1.6%       | <b>0.031</b>   |                |            |                |
| A*02:01             | A*02      | A*02:279       | A*02      | 2              | 0.5%       | 0.50           |                |            |                |
| A*02:01             | A*02      | A*02:48        | A*02      | 2              | 0.5%       | 0.50           |                |            |                |
| A*02:01             | A*02      | A*02:53        | A*02      | 1              | 0.3%       | 1.0            |                |            |                |
| A*02:01             | A*02      | A*02:65        | A*02      | 3              | 0.8%       | 0.25           |                |            |                |
| A*02:01             | A*02      | A*02:68        | A*02      | 2              | 0.5%       | 0.50           |                |            |                |
| A*02:01             | A*02      | A*02:77        | A*02      | 2              | 0.5%       | 0.50           |                |            |                |
| A*02:02             | A*02      | A*02:03        | A*02      | 1              | 4.2%       | 1.0            |                |            |                |
| A*02:02             | A*02      | A*02:05        | A*02      | 1              | 4.2%       | 1.0            |                |            |                |
| A*02:03             | A*02      | A*02:01        | A*02      | 2              | 12.5%      | 0.48           |                |            |                |
| A*02:04             | A*02      | A*02:01        | A*02      | 1              | 33.3%      | 1.0            | 58             | 11.1%      | <b>1.3E-18</b> |
| A*02:04             | A*02      | A*02:07        | A*02      | 1              | 33.3%      | 1.0            |                |            |                |
| A*02:05             | A*02      | A*02:02        | A*02      | 1              | 6.3%       | 1.0            |                |            |                |
| A*02:06             | A*02      | A*02:07        | A*02      | 1              | 2.6%       | 1.0            |                |            |                |
| A*02:06             | A*02      | A*02:48        | A*02      | 1              | 2.6%       | 1.0            |                |            |                |
| A*02:06             | A*02      | A*02:01        | A*02      | 4              | 10.5%      | 0.12           |                |            |                |
| A*02:06             | A*02      | A*02:43        | A*02      | 1              | 2.6%       | 1.0            |                |            |                |
| A*02:06             | A*02      | A*02:57        | A*02      | 3              | 7.9%       | 0.24           |                |            |                |
| A*02:07             | A*02      | A*02:01        | A*02      | 9              | 25.7%      | <b>0.0022</b>  |                |            |                |
| A*02:11             | A*02      | A*02:269       | A*02      | 1              | 16.7%      | 1.0            |                |            |                |
| A*02:11             | A*02      | A*02:48        | A*02      | 1              | 16.7%      | 1.0            |                |            |                |
| A*02:11             | A*02      | A*02:81        | A*02      | 1              | 16.7%      | 1.0            |                |            |                |
| A*02:17             | A*02      | A*02:01        | A*02      | 1              | 100.0%     | 1.0            |                |            |                |
| A*02:22             | A*02      | A*02:01        | A*02      | 1              | 50.0%      | 1.0            |                |            |                |
| A*02:01             | A*02      | A*26:02        | A*26      | 1              | 0.3%       | 1.0            | 4              | 0.8%       | 0.12           |
| A*02:01             | A*02      | A*26:01        | A*26      | 3              | 0.8%       | 0.25           |                |            |                |
| A*02:01             | A*02      | A*31:01        | A*31      | 2              | 0.5%       | 0.50           |                |            |                |
| A*02:02             | A*02      | A*31:01        | A*31      | 1              | 4.2%       | 1.0            | 3              | 0.6%       | 0.25           |
| A*02:01             | A*02      | A*33:03        | A*33      | 1              | 0.3%       | 1.0            | 1              | 0.2%       | 1.0            |
| A*02:06             | A*02      | A*34:01        | A*34      | 1              | 2.6%       | 1.0            | 1              | 0.2%       | 1.0            |
| A*02:20             | A*02      | A*69:01        | A*69      | 1              | 50.0%      | 1.0            | 1              | 0.2%       | 1.0            |
| A*02:01             | A*02      | no data        | no data   | 1              | 0.3%       | 1.0            | 1              | 0.2%       | 1.0            |



|         |      |         |         |    |        |                |    |        |                |
|---------|------|---------|---------|----|--------|----------------|----|--------|----------------|
| A*29:02 | A*29 | A*01:22 | A*01    | 4  | 7.5%   | 0.12           | 4  | 6.8%   | 0.12           |
| A*30:02 | A*30 | A*01:22 | A*01    | 4  | 8.3%   | 0.12           | 4  | 3.5%   | 0.12           |
| A*30:01 | A*30 | A*34:01 | A*34    | 1  | 1.6%   | 1.0            | ]  | 2.6%   | 0.25           |
| A*30:01 | A*30 | A*34:07 | A*34    | 1  | 1.6%   | 1.0            |    |        |                |
| A*30:01 | A*30 | A*34:09 | A*34    | 1  | 1.6%   | 1.0            |    |        |                |
| A*31:01 | A*31 | A*01:22 | A*01    | 2  | 3.1%   | 0.50           | 2  | 2.9%   | 0.50           |
| A*31:04 | A*31 | A*31:01 | A*31    | 1  | 25.0%  | 1.0            | 1  | 1.4%   | 1.0            |
| A*31:01 | A*31 | A*34:01 | A*34    | 2  | 3.1%   | 0.50           | 2  | 2.9%   | 0.50           |
| A*31:01 | A*31 | no data | no data | 1  | 1.5%   | 1.0            | 1  | 1.4%   | 1.0            |
| A*32:01 | A*32 | A*01:22 | A*01    | 1  | 2.4%   | 1.0            | 1  | 2.4%   | 1.0            |
| A*32:01 | A*32 | A*02:65 | A*02    | 1  | 2.4%   | 1.0            | ]  | 4.8%   | 0.49           |
| A*32:01 | A*32 | A*02:77 | A*02    | 1  | 2.4%   | 1.0            |    |        |                |
| A*32:01 | A*32 | A*74:01 | A*74    | 1  | 2.4%   | 1.0            | 1  | 2.4%   | 1.0            |
| A*33:03 | A*33 | A*01:22 | A*01    | 1  | 1.6%   | 1.0            | 1  | 1.4%   | 1.0            |
| A*33:03 | A*33 | A*31:01 | A*31    | 16 | 25.4%  | <b>1.0E-05</b> | 16 | 21.6%  | <b>1.2E-05</b> |
| A*33:01 | A*33 | A*34:01 | A*34    | 1  | 9.1%   | 1.0            | ]  | 9.5%   | <b>0.013</b>   |
| A*33:03 | A*33 | A*34:03 | A*34    | 1  | 3.2%   | 0.50           |    |        |                |
| A*33:03 | A*33 | A*34:01 | A*34    | 3  | 4.8%   | 0.24           |    |        |                |
| A*33:03 | A*33 | A*34:03 | A*34    | 2  | 3.2%   | 0.50           |    |        |                |
| A*33:03 | A*33 | A*66:01 | A*66    | 1  | 1.6%   | 1.0            | 1  | 1.4%   | 1.0            |
| A*34:02 | A*34 | A*01:22 | A*01    | 2  | 16.7%  | 0.48           | ]  | 25.0%  | 0.22           |
| A*34:02 | A*34 | A*01:81 | A*01    | 1  | 8.3%   | 1.0            |    |        |                |
| A*34:02 | A*34 | A*34:01 | A*34    | 1  | 8.3%   | 1.0            | 1  | 8.3%   | 1.0            |
| A*34:02 | A*34 | A*66:01 | A*66    | 4  | 33.3%  | 0.093          | 4  | 33.3%  | 0.093          |
| A*36:01 | A*36 | A*01:01 | A*01    | 1  | 4.8%   | 1.0            | 1  | 4.8%   | 1.0            |
| A*36:01 | A*36 | A*03:21 | A*03    | 1  | 4.8%   | 1.0            | 1  | 4.8%   | 1.0            |
| A*36:01 | A*36 | A*34:01 | A*34    | 2  | 9.5%   | 0.49           | ]  | 14.3%  | 0.23           |
| A*36:01 | A*36 | A*34:08 | A*34    | 1  | 4.8%   | 1.0            |    |        |                |
| A*66:02 | A*66 | A*01:22 | A*01    | 1  | 12.5%  | 1.0            | 1  | 5.0%   | 1.0            |
| A*66:02 | A*66 | A*02:01 | A*02    | 1  | 12.5%  | 1.0            | 1  | 5.0%   | 1.0            |
| A*66:02 | A*66 | A*34:01 | A*34    | 1  | 12.5%  | 1.0            | 1  | 5.0%   | 1.0            |
| A*66:02 | A*66 | A*66:01 | A*66    | 2  | 25.0%  | 0.47           | ]  | 15.0%  | 0.23           |
| A*66:02 | A*66 | A*66:03 | A*66    | 1  | 12.5%  | 1.0            |    |        |                |
| A*68:01 | A*68 | A*01:81 | A*01    | 2  | 3.8%   | 0.50           |    |        |                |
| A*68:01 | A*68 | A*01:22 | A*01    | 9  | 17.0%  | <b>0.0027</b>  | ]  | 16.9%  | <b>3.2E-05</b> |
| A*68:02 | A*68 | A*01:22 | A*01    | 3  | 8.6%   | 0.24           |    |        |                |
| A*68:02 | A*68 | A*01:81 | A*01    | 1  | 2.9%   | 1.0            |    |        |                |
| A*68:01 | A*68 | A*33:03 | A*33    | 1  | 1.9%   | 1.0            | 1  | 1.1%   | 1.0            |
| A*68:02 | A*68 | A*34:01 | A*34    | 2  | 5.7%   | 0.49           | 2  | 2.2%   | 0.50           |
| A*68:01 | A*68 | A*68:02 | A*68    | 4  | 7.5%   | 0.12           | ]  | 5.6%   | 0.059          |
| A*68:03 | A*68 | A*68:02 | A*68    | 1  | 100.0% | 1.0            |    |        |                |
| A*69:01 | A*69 | A*69:01 | A*69    | 2  | 3.8%   | 0.50           | 2  | 2.2%   | 0.50           |
| A*69:01 | A*69 | A*01:22 | A*01    | 1  | 50.0%  | 1.0            | ]  | 100.0% | 0.33           |
| A*69:01 | A*69 | A*01:81 | A*01    | 1  | 50.0%  | 1.0            |    |        |                |
| A*74:01 | A*74 | A*01:22 | A*01    | 1  | 4.5%   | 1.0            | 1  | 4.2%   | 1.0            |
| A*74:03 | A*74 | A*02:65 | A*02    | 1  | 50.0%  | 1.0            | 1  | 4.2%   | 1.0            |
| A*74:01 | A*74 | no data | no data | 1  | 4.5%   | 1.0            | 1  | 4.2%   | 1.0            |

**Supplementary Table 14. Discordant alleles of *HLA-B* in PHLAT prediction.**

| Experimental typing |           | Predicted data |           | 2nd field      |            |               | 1st field      |            |                |
|---------------------|-----------|----------------|-----------|----------------|------------|---------------|----------------|------------|----------------|
| 2nd field           | 1st field | 2nd field      | 1st field | No of miscalls | Error rate | <i>P</i>      | No of miscalls | Error rate | <i>P</i>       |
| B*07:02             | B*07      | B*07:42        | B*07      | 1              | 0.7%       | 1.0           | 15             | 10.3%      | <b>4.2E-05</b> |
| B*07:02             | B*07      | B*07:51        | B*07      | 1              | 0.7%       | 1.0           |                |            |                |
| B*07:02             | B*07      | B*07:62        | B*07      | 2              | 1.4%       | 0.50          |                |            |                |
| B*07:02             | B*07      | B*07:67        | B*07      | 1              | 0.7%       | 1.0           |                |            |                |
| B*07:02             | B*07      | B*07:68        | B*07      | 1              | 0.7%       | 1.0           |                |            |                |
| B*07:02             | B*07      | B*07:77        | B*07      | 1              | 0.7%       | 1.0           |                |            |                |
| B*07:02             | B*07      | B*07:95        | B*07      | 1              | 0.7%       | 1.0           |                |            |                |
| B*07:02             | B*07      | B*07:113       | B*07      | 1              | 0.7%       | 1.0           |                |            |                |
| B*07:02             | B*07      | B*07:114       | B*07      | 1              | 0.7%       | 1.0           |                |            |                |
| B*07:02             | B*07      | B*07:128       | B*07      | 1              | 0.7%       | 1.0           |                |            |                |
| B*07:02             | B*07      | B*07:142       | B*07      | 1              | 0.7%       | 1.0           |                |            |                |
| B*07:02             | B*07      | B*07:152       | B*07      | 1              | 0.7%       | 1.0           |                |            |                |
| B*07:05             | B*07      | B*07:06        | B*07      | 1              | 14.3%      | 1.0           |                |            |                |
| B*07:05             | B*07      | B*07:02        | B*07      | 1              | 14.3%      | 1.0           |                |            |                |
| B*07:02             | B*07      | B*40:11        | B*40      | 1              | 0.7%       | 1.0           | 1              | 0.7%       | 1.0            |
| B*08:01             | B*08      | B*08:79        | B*08      | 1              | 1.4%       | 1.0           | 1              | 1.4%       | 1.0            |
| B*08:01             | B*08      | B*15:180       | B*15      | 1              | 1.4%       | 1.0           | 1              | 1.4%       | 1.0            |
| B*08:01             | B*08      | B*40:02        | B*40      | 1              | 1.4%       | 1.0           | 1              | 1.4%       | 1.0            |
| B*13:01             | B*13      | B*13:02        | B*13      | 8              | 34.8%      | <b>0.0038</b> | 9              | 12.9%      | <b>0.0030</b>  |
| B*13:01             | B*13      | B*13:07        | B*13      | 1              | 4.3%       | 1.0           |                |            |                |
| B*14:01             | B*14      | B*14:02        | B*14      | 4              | 44.4%      | 0.082         | 6              | 12.8%      | <b>0.026</b>   |
| B*14:01             | B*14      | B*14:26        | B*14      | 1              | 11.1%      | 1.0           |                |            |                |
| B*14:02             | B*14      | B*14:08        | B*14      | 1              | 2.7%       | 1.0           | 4              | 8.5%       | 0.12           |
| B*14:02             | B*14      | B*39:01        | B*39      | 4              | 10.8%      | 0.11          |                |            |                |
| B*14:02             | B*14      | no data        | no data   | 2              | 5.4%       | 0.49          | 2              | 4.3%       | 0.49           |
| B*15:01             | B*15      | B*15:11        | B*15      | 1              | 1.4%       | 1.0           | 26             | 15.5%      | <b>5.0E-09</b> |
| B*15:01             | B*15      | B*15:18        | B*15      | 1              | 1.4%       | 1.0           |                |            |                |
| B*15:01             | B*15      | B*15:04        | B*15      | 1              | 1.4%       | 1.0           |                |            |                |
| B*15:01             | B*15      | B*15:07        | B*15      | 3              | 4.1%       | 0.24          |                |            |                |
| B*15:01             | B*15      | B*15:27        | B*15      | 2              | 2.7%       | 0.50          |                |            |                |
| B*15:01             | B*15      | B*15:32        | B*15      | 3              | 4.1%       | 0.24          |                |            |                |
| B*15:01             | B*15      | B*15:42        | B*15      | 1              | 1.4%       | 1.0           |                |            |                |
| B*15:01             | B*15      | B*15:77        | B*15      | 1              | 1.4%       | 1.0           |                |            |                |
| B*15:03             | B*15      | B*15:01        | B*15      | 1              | 3.7%       | 1.0           |                |            |                |
| B*15:03             | B*15      | B*15:18        | B*15      | 1              | 3.7%       | 1.0           |                |            |                |
| B*15:03             | B*15      | B*15:220       | B*15      | 3              | 11.1%      | 0.24          |                |            |                |
| B*15:07             | B*15      | B*15:01        | B*15      | 1              | 20.0%      | 1.0           |                |            |                |
| B*15:09             | B*15      | B*15:18        | B*15      | 1              | 100.0%     | 1.0           |                |            |                |
| B*15:15             | B*15      | B*15:01        | B*15      | 2              | 66.7%      | 0.40          |                |            |                |
| B*15:18             | B*15      | B*15:108       | B*15      | 1              | 8.3%       | 1.0           |                |            |                |
| B*15:18             | B*15      | B*15:220       | B*15      | 1              | 8.3%       | 1.0           |                |            |                |
| B*15:27             | B*15      | B*15:01        | B*15      | 1              | 33.3%      | 1.0           |                |            |                |
| B*15:37             | B*15      | B*15:10        | B*15      | 1              | 100.0%     | 1.0           | 2              | 1.1%       | 0.50           |
| B*15:01             | B*15      | B*35:14        | B*35      | 1              | 1.4%       | 1.0           |                |            |                |
| B*15:20             | B*15      | B*35:01        | B*35      | 1              | 100.0%     | 1.0           | 5              | 2.3%       | 0.12           |
| B*15:01             | B*15      | B*46:01        | B*46      | 2              | 2.7%       | 0.50          |                |            |                |
| B*15:02             | B*15      | B*46:01        | B*46      | 2              | 16.7%      | 0.48          |                |            |                |
| B*15:15             | B*15      | B*46:01        | B*46      | 1              | 33.3%      | 1.0           | 1              | 0.6%       | 1.0            |
| B*15:01             | B*15      | B*51:01        | B*51      | 1              | 1.4%       | 1.0           |                |            |                |
| B*15:01             | B*15      | B*56:03        | B*56      | 1              | 1.4%       | 1.0           | 1              | 0.6%       | 1.0            |
| B*18:01             | B*18      | B*18:02        | B*18      | 1              | 1.9%       | 1.0           | 1              | 1.8%       | 1.0            |
| B*18:01             | B*18      | no data        | no data   | 1              | 1.9%       | 1.0           | 1              | 1.8%       | 1.0            |
| B*27:05             | B*27      | B*08:01        | B*08      | 2              | 5.9%       | 0.49          | 2              | 4.7%       | 0.49           |
| B*27:05             | B*27      | B*13:02        | B*13      | 1              | 2.9%       | 1.0           | 1              | 2.3%       | 1.0            |
| B*27:03             | B*27      | B*27:05        | B*27      | 1              | 75.0%      | 0.14          | 6              | 14.0%      | <b>0.026</b>   |
| B*27:03             | B*27      | B*27:05        | B*27      | 3              | 75.0%      | 0.14          |                |            |                |
| B*27:05             | B*27      | B*27:07        | B*27      | 1              | 2.9%       | 1.0           |                |            |                |
| B*27:05             | B*27      | B*27:47        | B*27      | 1              | 2.9%       | 1.0           | 4              | 2.0%       | 0.12           |
| B*35:43             | B*35      | B*15:01        | B*15      | 2              | 20.0%      | 0.47          |                |            |                |
| B*35:43             | B*35      | B*15:11        | B*15      | 1              | 10.0%      | 1.0           |                |            |                |
| B*35:43             | B*35      | B*15:15        | B*15      | 1              | 10.0%      | 1.0           | 1              | 0.8%       | 1.0            |
| B*35:01             | B*35      | B*35:02        | B*35      | 1              | 0.8%       | 1.0           |                |            |                |
| B*35:01             | B*35      | B*35:08        | B*35      | 1              | 0.8%       | 1.0           |                |            |                |

|         |      |          |         |    |        |         |    |       |         |
|---------|------|----------|---------|----|--------|---------|----|-------|---------|
| B*35:01 | B*35 | B*35:14  | B*35    | 1  | 0.8%   | 1.0     |    |       |         |
| B*35:02 | B*35 | B*35:162 | B*35    | 1  | 8.3%   | 1.0     |    |       |         |
| B*35:03 | B*35 | B*35:01  | B*35    | 2  | 9.1%   | 0.49    |    |       |         |
| B*35:03 | B*35 | B*35:193 | B*35    | 1  | 4.5%   | 1.0     |    |       |         |
| B*35:05 | B*35 | B*35:01  | B*35    | 1  | 50.0%  | 1.0     | 18 | 9.1%  | 5.1E-06 |
| B*35:08 | B*35 | B*35:01  | B*35    | 1  | 11.1%  | 1.0     |    |       |         |
| B*35:10 | B*35 | B*35:01  | B*35    | 1  | 50.0%  | 1.0     |    |       |         |
| B*35:11 | B*35 | B*35:01  | B*35    | 2  | 100.0% | 0.33    |    |       |         |
| B*35:12 | B*35 | B*35:02  | B*35    | 1  | 20.0%  | 1.0     |    |       |         |
| B*35:12 | B*35 | B*35:14  | B*35    | 1  | 20.0%  | 1.0     |    |       |         |
| B*35:17 | B*35 | B*35:01  | B*35    | 2  | 28.6%  | 0.46    |    |       |         |
| B*35:43 | B*35 | B*35:14  | B*35    | 2  | 20.0%  | 0.47    |    |       |         |
| B*35:43 | B*35 | B*39:01  | B*39    | 1  | 10.0%  | 1.0     | 1  | 0.5%  | 1.0     |
| B*35:43 | B*35 | B*49:01  | B*49    | 2  | 20.0%  | 0.47    | 2  | 1.0%  | 0.50    |
| B*35:01 | B*35 | B*51:01  | B*51    | 1  | 0.8%   | 1.0     | 2  | 1.0%  | 0.50    |
| B*35:12 | B*35 | B*51:01  | B*51    | 1  | 20.0%  | 1.0     |    |       |         |
| B*35:01 | B*35 | B*52:01  | B*52    | 1  | 0.8%   | 1.0     | 1  | 0.5%  | 1.0     |
| B*35:10 | B*35 | B*53:01  | B*53    | 1  | 50.0%  | 1.0     | 1  | 0.5%  | 1.0     |
| B*35:17 | B*35 | B*58:01  | B*58    | 1  | 14.3%  | 1.0     | 1  | 0.5%  | 1.0     |
| B*35:03 | B*35 | B*78:02  | B*78    | 1  | 4.5%   | 1.0     | 1  | 0.5%  | 1.0     |
| B*35:01 | B*35 | no data  | no data | 1  | 0.8%   | 1.0     |    |       |         |
| B*35:12 | B*35 | no data  | no data | 1  | 20.0%  | 1.0     | 3  | 1.5%  | 0.25    |
| B*35:17 | B*35 | no data  | no data | 1  | 14.3%  | 1.0     |    |       |         |
| B*38:01 | B*38 | B*39:01  | B*39    | 3  | 17.6%  | 0.23    | 4  | 16.0% | 0.11    |
| B*38:02 | B*38 | B*39:01  | B*39    | 1  | 12.5%  | 1.0     |    |       |         |
| B*38:01 | B*38 | B*46:01  | B*46    | 1  | 5.9%   | 1.0     | 1  | 4.0%  | 1.0     |
| B*38:01 | B*38 | no data  | no data | 1  | 5.9%   | 1.0     | 1  | 4.0%  | 1.0     |
| B*39:03 | B*39 | B*39:24  | B*39    | 1  | 100.0% | 1.0     |    |       |         |
| B*39:06 | B*39 | B*39:01  | B*39    | 11 | 68.8%  | 6.8E-05 | 15 | 23.4% | 2.4E-05 |
| B*39:06 | B*39 | B*39:34  | B*39    | 1  | 6.3%   | 1.0     |    |       |         |
| B*39:10 | B*39 | B*39:02  | B*39    | 1  | 25.0%  | 1.0     |    |       |         |
| B*39:11 | B*39 | B*39:05  | B*39    | 1  | 25.0%  | 1.0     |    |       |         |
| B*40:01 | B*40 | B*07:02  | B*07    | 12 | 10.3%  | 0.00036 | 12 | 6.3%  | 0.00041 |
| B*40:02 | B*40 | B*08:01  | B*08    | 1  | 1.9%   | 1.0     | 1  | 0.5%  | 1.0     |
| B*40:02 | B*40 | B*27:05  | B*27    | 1  | 1.9%   | 1.0     | 1  | 0.5%  | 1.0     |
| B*40:01 | B*40 | B*35:03  | B*35    | 1  | 0.9%   | 1.0     | 1  | 0.5%  | 1.0     |
| B*40:01 | B*40 | B*40:117 | B*40    | 1  | 0.9%   | 1.0     |    |       |         |
| B*40:01 | B*40 | B*40:10  | B*40    | 1  | 0.9%   | 1.0     |    |       |         |
| B*40:01 | B*40 | B*40:114 | B*40    | 1  | 0.9%   | 1.0     |    |       |         |
| B*40:01 | B*40 | B*40:137 | B*40    | 1  | 0.9%   | 1.0     |    |       |         |
| B*40:01 | B*40 | B*40:138 | B*40    | 1  | 0.9%   | 1.0     |    |       |         |
| B*40:01 | B*40 | B*40:139 | B*40    | 1  | 0.9%   | 1.0     |    |       |         |
| B*40:01 | B*40 | B*40:14  | B*40    | 1  | 0.9%   | 1.0     |    |       |         |
| B*40:01 | B*40 | B*40:146 | B*40    | 2  | 1.7%   | 0.50    |    |       |         |
| B*40:01 | B*40 | B*40:149 | B*40    | 1  | 0.9%   | 1.0     |    |       |         |
| B*40:01 | B*40 | B*40:150 | B*40    | 1  | 0.9%   | 1.0     | 27 | 14.1% | 5.5E-09 |
| B*40:01 | B*40 | B*40:152 | B*40    | 1  | 0.9%   | 1.0     |    |       |         |
| B*40:01 | B*40 | B*40:171 | B*40    | 1  | 0.9%   | 1.0     |    |       |         |
| B*40:01 | B*40 | B*40:80  | B*40    | 1  | 0.9%   | 1.0     |    |       |         |
| B*40:02 | B*40 | B*40:57  | B*40    | 1  | 1.9%   | 1.0     |    |       |         |
| B*40:02 | B*40 | B*40:97  | B*40    | 1  | 1.9%   | 1.0     |    |       |         |
| B*40:02 | B*40 | B*40:06  | B*40    | 1  | 1.9%   | 1.0     |    |       |         |
| B*40:02 | B*40 | B*40:40  | B*40    | 2  | 3.8%   | 0.50    |    |       |         |
| B*40:04 | B*40 | B*40:02  | B*40    | 3  | 75.0%  | 0.14    |    |       |         |
| B*40:06 | B*40 | B*40:02  | B*40    | 4  | 25.0%  | 0.10    |    |       |         |
| B*40:20 | B*40 | B*40:03  | B*40    | 1  | 100.0% | 1.0     |    |       |         |
| B*40:01 | B*40 | B*41:01  | B*41    | 1  | 0.9%   | 1.0     | 1  | 0.5%  | 1.0     |
| B*40:02 | B*40 | B*44:03  | B*44    | 1  | 1.9%   | 1.0     | 1  | 0.5%  | 1.0     |
| B*41:02 | B*41 | B*08:01  | B*08    | 1  | 16.7%  | 1.0     | 1  | 6.3%  | 1.0     |
| B*41:02 | B*41 | B*15:03  | B*15    | 1  | 16.7%  | 1.0     | 1  | 6.3%  | 1.0     |
| B*41:02 | B*41 | B*41:01  | B*41    | 1  | 16.7%  | 1.0     | 1  | 6.3%  | 1.0     |
| B*41:01 | B*41 | B*42:01  | B*42    | 1  | 11.1%  | 1.0     |    |       |         |
| B*41:02 | B*41 | B*42:01  | B*42    | 1  | 16.7%  | 1.0     | 4  | 25.0% | 0.10    |
| B*41:02 | B*41 | B*42:08  | B*42    | 1  | 16.7%  | 1.0     |    |       |         |
| B*41:04 | B*41 | B*42:01  | B*42    | 1  | 100.0% | 1.0     |    |       |         |
| B*42:01 | B*42 | B*42:07  | B*42    | 1  | 3.8%   | 1.0     | 1  | 3.4%  | 1.0     |

|         |      |          |         |    |        |                |   |       |       |                |
|---------|------|----------|---------|----|--------|----------------|---|-------|-------|----------------|
| B*42:01 | B*42 | no data  | no data | 1  | 3.8%   | 1.0            | 1 | 3.4%  | 1.0   |                |
| B*44:03 | B*44 | B*40:02  | B*40    | 1  | 1.2%   | 1.0            | 1 | 0.6%  | 1.0   |                |
| B*44:02 | B*44 | B*44:03  | B*44    | 1  | 1.3%   | 1.0            | } | 17    | 10.9% | <b>4.7E-06</b> |
| B*44:02 | B*44 | B*44:09  | B*44    | 4  | 5.1%   | 0.12           |   |       |       |                |
| B*44:02 | B*44 | B*44:138 | B*44    | 1  | 1.3%   | 1.0            |   |       |       |                |
| B*44:03 | B*44 | B*44:02  | B*44    | 2  | 2.4%   | 0.50           |   |       |       |                |
| B*44:03 | B*44 | B*44:103 | B*44    | 1  | 1.2%   | 1.0            |   |       |       |                |
| B*44:03 | B*44 | B*44:37  | B*44    | 1  | 1.2%   | 1.0            |   |       |       |                |
| B*44:03 | B*44 | B*44:46  | B*44    | 5  | 6.0%   | 0.059          |   |       |       |                |
| B*44:05 | B*44 | B*44:02  | B*44    | 1  | 50.0%  | 1.0            |   |       |       |                |
| B*44:05 | B*44 | B*44:70  | B*44    | 1  | 50.0%  | 1.0            |   |       |       |                |
| B*44:02 | B*44 | B*45:01  | B*45    | 1  | 1.3%   | 1.0            |   |       |       |                |
| B*44:02 | B*44 | B*47:01  | B*47    | 1  | 1.3%   | 1.0            | 1 | 0.6%  | 1.0   |                |
| B*44:02 | B*44 | B*51:42  | B*51    | 1  | 1.3%   | 1.0            | 1 | 0.6%  | 1.0   |                |
| B*45:01 | B*45 | no data  | no data | 1  | 3.3%   | 1.0            | 1 | 3.3%  | 1.0   |                |
| B*46:01 | B*46 | B*15:07  | B*15    | 1  | 1.6%   | 1.0            | } | 3     | 4.7%  | 0.24           |
| B*46:01 | B*46 | B*15:01  | B*15    | 2  | 3.1%   | 0.50           |   |       |       |                |
| B*48:05 | B*48 | B*07:05  | B*07    | 1  | 100.0% | 1.0            | 1 | 4.8%  | 1.0   |                |
| B*48:02 | B*48 | B*35:01  | B*35    | 1  | 100.0% | 1.0            | 1 | 4.8%  | 1.0   |                |
| B*48:01 | B*48 | B*48:03  | B*48    | 2  | 11.1%  | 0.49           | 2 | 9.5%  | 0.49  |                |
| B*49:01 | B*49 | B*15:01  | B*15    | 1  | 4.8%   | 1.0            | } | 2     | 9.5%  | 0.49           |
| B*49:01 | B*49 | B*15:03  | B*15    | 1  | 4.8%   | 1.0            |   |       |       |                |
| B*49:01 | B*49 | B*18:01  | B*18    | 1  | 4.8%   | 1.0            | 1 | 4.8%  | 1.0   |                |
| B*51:01 | B*51 | B*35:01  | B*35    | 3  | 2.8%   | 0.25           | } | 3     | 2.7%  | 0.25           |
| B*51:01 | B*51 | B*51:02  | B*51    | 1  | 0.9%   | 1.0            |   |       |       |                |
| B*51:02 | B*51 | B*51:01  | B*51    | 1  | 25.0%  | 1.0            | } | 4     | 3.5%  | 0.12           |
| B*51:08 | B*51 | B*51:01  | B*51    | 1  | 100.0% | 1.0            |   |       |       |                |
| B*51:23 | B*51 | B*51:02  | B*51    | 1  | 100.0% | 1.0            |   |       |       |                |
| B*51:01 | B*51 | B*56:05  | B*56    | 1  | 0.9%   | 1.0            | 1 | 0.9%  | 1.0   |                |
| B*52:01 | B*52 | B*35:03  | B*35    | 1  | 2.1%   | 1.0            | 1 | 2.1%  | 1.0   |                |
| B*52:01 | B*52 | B*51:01  | B*51    | 2  | 4.2%   | 0.49           | 2 | 4.2%  | 0.49  |                |
| B*53:01 | B*53 | B*35:01  | B*35    | 3  | 5.0%   | 0.24           | 3 | 5.0%  | 0.24  |                |
| B*53:01 | B*53 | B*51:01  | B*51    | 1  | 1.7%   | 1.0            | 1 | 1.7%  | 1.0   |                |
| B*53:01 | B*53 | B*53:24  | B*53    | 1  | 1.7%   | 1.0            | 1 | 1.7%  | 1.0   |                |
| B*53:01 | B*53 | B*56:04  | B*56    | 1  | 1.7%   | 1.0            | 1 | 1.7%  | 1.0   |                |
| B*53:01 | B*53 | no data  | no data | 2  | 3.3%   | 0.50           | 2 | 3.3%  | 0.50  |                |
| B*54:01 | B*54 | B*48:01  | B*48    | 1  | 5.3%   | 1.0            | 1 | 5.3%  | 1.0   |                |
| B*54:01 | B*54 | B*54:18  | B*54    | 1  | 5.3%   | 1.0            | 1 | 5.3%  | 1.0   |                |
| B*54:01 | B*54 | B*55:02  | B*55    | 1  | 5.3%   | 1.0            | 1 | 5.3%  | 1.0   |                |
| B*55:01 | B*55 | B*55:02  | B*55    | 2  | 11.1%  | 0.49           | 2 | 7.1%  | 0.49  |                |
| B*55:01 | B*55 | B*56:03  | B*56    | 1  | 5.6%   | 1.0            | 1 | 3.6%  | 1.0   |                |
| B*56:01 | B*56 | B*55:24  | B*55    | 1  | 5.3%   | 1.0            | 1 | 5.3%  | 1.0   |                |
| B*56:01 | B*56 | B*56:04  | B*56    | 1  | 5.3%   | 1.0            | 1 | 5.3%  | 1.0   |                |
| B*56:01 | B*56 | B*59:01  | B*59    | 1  | 5.3%   | 1.0            | 1 | 5.3%  | 1.0   |                |
| B*57:03 | B*57 | B*44:03  | B*44    | 1  | 7.7%   | 1.0            | 1 | 1.6%  | 1.0   |                |
| B*57:02 | B*57 | B*57:01  | B*57    | 1  | 33.3%  | 1.0            | } | 8     | 12.9% | <b>0.0061</b>  |
| B*57:02 | B*57 | B*57:57  | B*57    | 1  | 33.3%  | 1.0            |   |       |       |                |
| B*57:03 | B*57 | B*57:01  | B*57    | 1  | 7.7%   | 1.0            |   |       |       |                |
| B*57:03 | B*57 | B*57:11  | B*57    | 1  | 7.7%   | 1.0            |   |       |       |                |
| B*57:03 | B*57 | B*57:57  | B*57    | 4  | 30.8%  | 0.096          |   |       |       |                |
| B*58:01 | B*58 | B*35:01  | B*35    | 3  | 5.3%   | 0.24           | } | 5     | 6.6%  | 0.058          |
| B*58:02 | B*58 | B*35:01  | B*35    | 1  | 5.3%   | 1.0            |   |       |       |                |
| B*58:02 | B*58 | B*35:17  | B*35    | 1  | 5.3%   | 1.0            | } | 1     | 1.3%  | 1.0            |
| B*58:01 | B*58 | B*44:03  | B*44    | 1  | 1.8%   | 1.0            |   |       |       |                |
| B*58:01 | B*58 | B*51:01  | B*51    | 1  | 1.8%   | 1.0            |   |       |       |                |
| B*58:01 | B*58 | B*53:01  | B*53    | 1  | 1.8%   | 1.0            | } | 2     | 2.6%  | 0.50           |
| B*58:02 | B*58 | B*53:01  | B*53    | 1  | 5.3%   | 1.0            |   |       |       |                |
| B*58:01 | B*58 | B*58:31  | B*58    | 1  | 1.8%   | 1.0            | } | 13    | 17.1% | <b>0.00014</b> |
| B*58:02 | B*58 | B*58:01  | B*58    | 10 | 52.6%  | <b>0.00039</b> |   |       |       |                |
| B*58:02 | B*58 | B*58:07  | B*58    | 1  | 5.3%   | 1.0            |   |       |       |                |
| B*58:02 | B*58 | B*58:28  | B*58    | 1  | 5.3%   | 1.0            |   |       |       |                |
| B*81:01 | B*81 | B*48:01  | B*48    | 1  | 6.3%   | 1.0            | 1 | 6.3%  | 1.0   |                |
| B*81:01 | B*81 | B*81:02  | B*81    | 1  | 6.3%   | 1.0            | 1 | 6.3%  | 1.0   |                |
| B*82:01 | B*82 | no data  | no data | 1  | 100.0% | 1.0            | 1 | 50.0% | 1.0   |                |

**Supplementary Table 15. Discordant alleles of HLA-C in PHLAT prediction.**

| Experimental typing |           | Predicted data |           | 2nd field      |            |                | 1st field      |            |                |
|---------------------|-----------|----------------|-----------|----------------|------------|----------------|----------------|------------|----------------|
| 2nd field           | 1st field | 2nd field      | 1st field | No of miscalls | Error rate | <i>P</i>       | No of miscalls | Error rate | <i>P</i>       |
| C*01:02             | C*01      | C*01:03        | C*01      | 1              | 0.7%       | 1.0            |                |            |                |
| C*01:02             | C*01      | C*01:06        | C*01      | 1              | 0.7%       | 1.0            |                |            |                |
| C*01:02             | C*01      | C*01:30        | C*01      | 1              | 0.7%       | 1.0            | 4              | 2.7%       | 0.12           |
| C*01:02             | C*01      | C*01:58        | C*01      | 1              | 0.7%       | 1.0            |                |            |                |
| C*02:02             | C*02      | C*02:10        | C*02      | 5              | 11.6%      | 0.055          | 5              | 7.9%       | 0.058          |
| C*03:03             | C*03      | C*01:02        | C*01      | 1              | 2.6%       | 1.0            | 1              | 0.3%       | 1.0            |
| C*03:03             | C*03      | C*02:10        | C*02      | 1              | 2.6%       | 1.0            | 1              | 0.3%       | 1.0            |
| C*03:02             | C*03      | C*03:04        | C*03      | 1              | 1.0%       | 1.0            |                |            |                |
| C*03:03             | C*03      | C*03:20        | C*03      | 1              | 1.0%       | 1.0            |                |            |                |
| C*03:03             | C*03      | C*03:04        | C*03      | 1              | 1.0%       | 1.0            |                |            |                |
| C*03:03             | C*03      | C*03:13        | C*03      | 4              | 3.9%       | 0.12           |                |            |                |
| C*03:03             | C*03      | C*03:61        | C*03      | 6              | 1.0%       | 1.0            |                |            |                |
| C*03:04             | C*03      | C*03:02        | C*03      | 3              | 5.9%       | <b>0.029</b>   | 32             | 11.2%      | <b>2.1E-11</b> |
| C*03:04             | C*03      | C*03:03        | C*03      | 13             | 3.9%       | 0.12           |                |            |                |
| C*03:04             | C*03      | C*03:13        | C*03      | 1              | 1.0%       | 1.0            |                |            |                |
| C*03:05             | C*03      | C*03:02        | C*03      | 1              | 1.0%       | 1.0            |                |            |                |
| C*03:36             | C*03      | C*03:02        | C*03      | 1              | 1.0%       | 1.0            |                |            |                |
| C*03:03             | C*03      | C*04:01        | C*04      | 4              | 1.0%       | 1.0            |                |            |                |
| C*03:04             | C*03      | C*04:01        | C*04      | 1              | 1.8%       | 0.25           | 5              | 0.6%       | 0.50           |
| C*03:03             | C*03      | C*06:02        | C*06      | 1              | 7.9%       | <b>0.00019</b> | 1              | 0.3%       | 1.0            |
| C*03:03             | C*03      | C*12:03        | C*12      | 1              | 0.6%       | 1.0            | 1              | 0.3%       | 1.0            |
| C*03:03             | C*03      | C*18:01        | C*18      | 1              | 0.6%       | 1.0            | 1              | 0.3%       | 1.0            |
| C*03:02             | C*03      | no data        | no data   | 1              | 12.5%      | 1.0            |                |            |                |
| C*03:03             | C*03      | no data        | no data   | 1              | 100.0%     | 1.0            | 2              | 0.6%       | 0.50           |
| C*04:04             | C*04      | C*04:01        | C*04      | 1              | 0.8%       | 0.50           |                |            |                |
| C*04:04             | C*04      | C*04:13        | C*04      | 1              | 50.0%      | 1.0            | 2              | 0.8%       | 0.50           |
| C*04:01             | C*04      | no data        | no data   | 2              | 50.0%      | 1.0            | 2              | 0.8%       | 0.50           |
| C*05:01             | C*05      | C*05:08        | C*05      | 3              | 3.3%       | 0.25           |                |            |                |
| C*05:01             | C*05      | C*05:09        | C*05      | 1              | 1.1%       | 1.0            |                |            |                |
| C*05:01             | C*05      | C*05:37        | C*05      | 1              | 1.1%       | 1.0            | 5              | 5.5%       | 0.059          |
| C*05:01             | C*05      | C*08:02        | C*08      | 1              | 1.1%       | 1.0            |                |            |                |
| C*05:01             | C*05      | C*12:03        | C*12      | 1              | 1.1%       | 1.0            | 1              | 1.1%       | 1.0            |
| C*06:02             | C*06      | C*06:24        | C*06      | 3              | 2.1%       | 0.25           |                |            |                |
| C*06:02             | C*06      | C*06:46        | C*06      | 1              | 0.7%       | 1.0            | 4              | 2.7%       | 0.12           |
| C*06:02             | C*06      | C*12:02        | C*12      | 2              | 1.4%       | 0.50           |                |            |                |
| C*06:02             | C*06      | C*12:03        | C*12      | 1              | 0.7%       | 1.0            | 4              | 2.7%       | 0.12           |
| C*06:02             | C*06      | C*12:19        | C*12      | 1              | 0.7%       | 1.0            |                |            |                |
| C*07:01             | C*07      | C*07:02        | C*07      | 7              | 4.8%       | <b>0.015</b>   |                |            |                |
| C*07:01             | C*07      | C*07:103       | C*07      | 1              | 0.7%       | 1.0            |                |            |                |
| C*07:01             | C*07      | C*07:18        | C*07      | 3              | 2.1%       | 0.25           |                |            |                |
| C*07:01             | C*07      | C*07:27        | C*07      | 1              | 0.7%       | 1.0            |                |            |                |
| C*07:01             | C*07      | C*07:71        | C*07      | 1              | 0.7%       | 1.0            |                |            |                |
| C*07:01             | C*07      | C*07:85        | C*07      | 1              | 0.7%       | 1.0            |                |            |                |
| C*07:02             | C*07      | C*07:01        | C*07      | 1              | 0.4%       | 1.0            |                |            |                |
| C*07:02             | C*07      | C*07:124       | C*07      | 2              | 0.4%       | 1.0            | 24             | 5.7%       | <b>8.5E-08</b> |
| C*07:02             | C*07      | C*07:135       | C*07      | 1              | 0.8%       | 0.50           |                |            |                |
| C*07:02             | C*07      | C*07:121       | C*07      | 1              | 0.4%       | 1.0            |                |            |                |
| C*07:02             | C*07      | C*07:174       | C*07      | 1              | 0.4%       | 1.0            |                |            |                |
| C*07:02             | C*07      | C*07:178       | C*07      | 1              | 0.4%       | 1.0            |                |            |                |
| C*07:02             | C*07      | C*07:18        | C*07      | 1              | 0.4%       | 1.0            |                |            |                |
| C*07:02             | C*07      | C*07:46        | C*07      | 1              | 0.4%       | 1.0            |                |            |                |
| C*07:04             | C*07      | C*07:01        | C*07      | 1              | 3.3%       | 1.0            |                |            |                |
| C*08:01             | C*08      | C*05:01        | C*05      | 3              | 6.1%       | 0.24           |                |            |                |
| C*08:02             | C*08      | C*05:01        | C*05      | 5              | 6.1%       | 0.24           | 8              | 6.9%       | <b>0.0069</b>  |
| C*08:01             | C*08      | C*08:22        | C*08      | 4              | 8.2%       | 0.12           |                |            |                |
| C*08:01             | C*08      | C*08:03        | C*08      | 3              | 2.0%       | 1.0            |                |            |                |
| C*08:02             | C*08      | C*08:04        | C*08      | 1              | 2.0%       | 1.0            | 9              | 7.8%       | <b>0.0033</b>  |
| C*08:02             | C*08      | C*08:24        | C*08      | 1              | 10.2%      | 0.056          |                |            |                |
| C*08:01             | C*08      | C*12:03        | C*12      | 1              | 2.0%       | 1.0            | 1              | 0.9%       | 1.0            |
| C*08:01             | C*08      | C*14:02        | C*14      | 1              | 2.0%       | 1.0            | 1              | 0.9%       | 1.0            |
| C*08:02             | C*08      | no data        | no data   | 2              | 4.1%       | 0.49           | 2              | 1.7%       | 0.50           |
| C*12:02             | C*12      | C*01:21        | C*01      | 2              | 5.6%       | 0.49           | 2              | 2.0%       | 0.50           |
| C*12:03             | C*12      | C*04:01        | C*04      | 1              | 1.6%       | 1.0            | 1              | 1.0%       | 1.0            |

|         |      |         |         |   |       |      |   |   |      |       |
|---------|------|---------|---------|---|-------|------|---|---|------|-------|
| C*12:03 | C*12 | C*06:02 | C*06    | 1 | 1.6%  | 1.0  | ] | 2 | 2.0% | 0.50  |
| C*12:03 | C*12 | C*06:73 | C*06    | 1 | 1.6%  | 1.0  |   |   |      |       |
| C*12:03 | C*12 | C*12:02 | C*12    | 4 | 6.3%  | 0.12 | ] | 5 | 5.0% | 0.059 |
| C*12:03 | C*12 | C*12:13 | C*12    | 1 | 1.6%  | 1.0  |   |   |      |       |
| C*12:02 | C*12 | C*14:03 | C*14    | 1 | 2.8%  | 1.0  |   | 1 | 1.0% | 1.0   |
| C*12:03 | C*12 | no data | no data | 2 | 3.1%  | 0.50 |   | 2 | 2.0% | 0.50  |
| C*14:03 | C*14 | C*14:02 | C*14    | 3 | 20.0% | 0.22 |   | 3 | 6.5% | 0.12  |
| C*14:02 | C*14 | C*16:01 | C*16    | 1 | 2.1%  | 1.0  |   | 1 | 1.6% | 1.0   |
| C*14:03 | C*14 | no data | no data | 1 | 6.7%  | 1.0  |   | 1 | 1.6% | 1.0   |
| C*15:02 | C*15 | C*15:13 | C*15    | 1 | 2.1%  | 1.0  | ] | 2 | 5.1% | 0.24  |
| C*15:02 | C*15 | C*15:05 | C*15    | 1 | 2.1%  | 1.0  |   |   |      |       |
| C*16:02 | C*16 | C*16:01 | C*16    | 1 | 20.0% | 1.0  |   | 1 | 1.1% | 1.0   |
| C*16:01 | C*16 | no data | no data | 1 | 1.2%  | 1.0  |   | 1 | 1.1% | 1.0   |
| C*18:01 | C*18 | C*18:02 | C*18    | 1 | 8.3%  | 1.0  |   | 1 | 8.3% | 1.0   |
